# Supplementary material for: Continuously processing waste lignin into high-value carbon nanotube fibers
Source: PubMed Central journal article supplement (PMC9525656; doi:10.1038/s41467-022-33496-2), 2022-09-30
Supplement: 41467_2022_33496_MOESM1_ESM.pdf [file 41467_2022_33496_MOESM1_ESM.pdf]

## Supplementary Information

### Continuously Processing Waste Lignin into High-value Carbon Nanotube Fibers

Fuyao Liu, Qianqian Wang, Gongxun Zhai, Hengxue Xiang<sup>\*</sup>, Jialiang Zhou, Chao Jia<sup>\*</sup>, Liping  
Zhu, Qilin Wu, Meifang Zhu<sup>\*</sup>

State Key Laboratory for Modification of Chemical Fibers and Polymer Materials, College of  
Materials Science and Engineering, Donghua University, Shanghai 201620, China

**\*Email:** hengxuexiang@dhu.edu.cn; jiachao0806@dhu.edu.cn; zmf@dhu.edu.cn

**This file includes:**

Supplementary Table 1 to 10

Supplementary Figure 1 to 28

Supplementary Reference 1 to 64

## Supplementary Tables

**Supplementary Table 1.** Comparison of the structures and morphologies of our prepared CNTs with those of other reported CNTs.

| <b>Biomass</b>         | <b>Carbon source type</b> | <b>Continuous preparation</b>   | <b>Synthesis temperature (°C)</b> | <b>I<sub>G</sub>/I<sub>D</sub></b> | <b>CNT type</b> | <b>Micro morphology</b> | <b>Reference</b> |
|------------------------|---------------------------|---------------------------------|-----------------------------------|------------------------------------|-----------------|-------------------------|------------------|
| Lignin                 | Biomass                   | Yes<br>(120 m h <sup>-1</sup> ) | 1400                              | 3.84                               | MWNTs           | CNT aerogels            | Our work         |
| Eucalyptus oil         | Biomass                   | No                              | 850                               | 3.3                                | SWNTs/<br>MWNTs | CNT powders             | 1                |
| Turpentine oil         | Biomass                   | No                              | 700                               | 0.93                               | MWNTs           | CNT arrays              | 2                |
| Sesame oil             | Biomass                   | No                              | 900                               | 0.98                               | MWNTs           | CNT arrays              | 3                |
| Grass                  | Biomass                   | No                              | 600                               | 2.0                                | MWNTs           | CNT arrays              | 4                |
| Plant                  | Biomass                   | No                              | > 600                             | -                                  | MWNTs           | CNT powders             | 5                |
| Poplar leaves          | Biomass                   | No                              | 450                               | 0.79                               | MWNTs           | CNT powders             | 6                |
| Methane                | Chemicals                 | Yes                             | 1200                              | 1.2                                | MWNTs           | CNT aerogels            | 7                |
| Hexane                 | Chemicals                 | Yes                             | 1150-1500                         | 3.36-<br>10.43                     | MWNTs           | CNT aerogels            | 8                |
| Ethanol                | Chemicals                 | Yes                             | 1150–1300                         | 3.74                               | MWNTs           | CNT aerogels            | 9                |
| Toluene                | Chemicals                 | Yes                             | 1200                              | 1.78-<br>14.28                     | MWNTs           | CNT aerogels            | 10               |
| Acetylene              | Chemicals                 | Yes                             | -                                 | 1.22                               | MWNTs           | CNT arrays              | 11               |
| Toluene                | Chemicals                 | Yes                             | 1150                              | 0.94                               | MWNTs           | CNT aerogels            | 12               |
| Xylene/dichlorobenzene | Chemicals                 | No                              | 800                               | 1.11                               | MWNTs           | CNT arrays              | 13               |
| Methane                | Chemicals                 | Yes                             | 1175                              | 3.61                               | MWNTs           | CNT aerogels            | 14               |
| Methane                | Chemicals                 | Yes                             | 1200                              | 7.7-<br>14.3                       | SWNTs/<br>DWNTs | CNT aerogels            | 7                |
| Toluene                | Chemicals                 | Yes                             | 1200                              | 1.92-<br>33.33                     | SWNTs           | CNT aerogels            | 10               |
| Acetylene/<br>Ethylene | Chemicals                 | Yes                             | 1175                              | 18.52-<br>69.87                    | SWNTs/<br>DWNTs | CNT aerogels            | 14               |
| Ethanol                | Chemicals                 | Yes                             | 1000                              | > 30                               | SWNTs           | CNT aerogels            | 15               |
| Carbon<br>monoxide     | Chemicals                 | Yes                             | 800-1050                          | 10-<br>440                         | SWNTs           | CNT films               | 16               |
| Acetone                | Chemicals                 | Yes                             | 1200                              | 10-                                | SWNTs           | CNT aerogels            | 17               |

|                    |           |     |      |       |                 |              |    |
|--------------------|-----------|-----|------|-------|-----------------|--------------|----|
|                    |           |     |      | 78.69 |                 |              |    |
| Methane            | Chemicals | Yes | 1200 | > 60  | SWNTs/<br>DWNTs | CNT aerogels | 18 |
| Carbon<br>monoxide | Chemicals | Yes | 880  | 224   | SWNTs           | CNT films    | 19 |

---

**Note:** SWNTs: single-walled carbon nanotubes; DWNTs: double-walled carbon nanotubes;

MWNTs: multi-walled carbon nanotubes.

**Supplementary Table 2.** Assignments of  $^{13}\text{C}$ - $^1\text{H}$  cross signals in the HSQC spectra of lignin.

| <b>Label</b>              | <b><math>\delta\text{C}/\delta\text{H}</math> (ppm)</b> | <b>Assignments</b>                                                  |
|---------------------------|---------------------------------------------------------|---------------------------------------------------------------------|
| $\text{B}_\beta$          | 53.5/3.07                                               | $\text{C}_\beta\text{-H}_\beta$ in $\beta$ - $\beta$ resinol (B)    |
| $\text{OCH}_3$            | 56.4/3.70                                               | C-H in methoxyls                                                    |
| $\text{A}_\gamma$         | 59.9/3.35-3.80                                          | $\text{C}_\gamma\text{-H}_\gamma$ in $\beta$ -O-4 substructures (A) |
| $\text{B}_\gamma$         | 71.2/3.82-4.18                                          | $\text{C}_\gamma\text{-H}_\gamma$ in $\beta$ - $\beta$ resinol (B)  |
| $\text{A}_\alpha$         | 71.8/4.86                                               | $\text{C}_\alpha\text{-H}_\alpha$ in $\beta$ -O-4 unit (A)          |
| $\text{A}\beta(\text{G})$ | 83.4/4.38                                               | $\text{C}_\beta\text{-H}_\beta$ in $\beta$ -O-4 linked to G (A)     |
| $\text{B}_\alpha$         | 84.8/4.66                                               | $\text{C}_\alpha\text{-H}_\alpha$ in $\beta$ - $\beta$ resinol (B)  |
| $\text{S}_{2,6}$          | 103.9/6.70                                              | $\text{C}_{2,6}\text{-H}_{2,6}$ in syringyl units (S)               |
| $\text{S}'_{2,6}$         | 106.3/7.32                                              | $\text{C}_{2,6}\text{-H}_{2,6}$ in oxidized S units (S')            |
| $\text{G}_2$              | 110.8/6.97                                              | $\text{C}_2\text{-H}_5$ in guaiacyl units (G)                       |
| $\text{G}_5$              | 114.5/6.70                                              | $\text{C}_5\text{-H}_5$ in guaiacyl units (G)                       |
| $\text{G}_6$              | 119.0/6.78                                              | $\text{C}_6\text{-H}_6$ in guaiacyl units (G)                       |

**Supplementary Table 3.** Simulated analysis result of lignin molecule from ChemDraw.

| <b>Item</b>        | <b>Result</b>                                     |
|--------------------|---------------------------------------------------|
| Chemical formula   | C <sub>205</sub> H <sub>234</sub> O <sub>81</sub> |
| Exact mass         | 3991.4                                            |
| Molecular weight   | 3994.0                                            |
| Elemental analysis | C: 61.65, H: 5.91, O: 32.45                       |

**Supplementary Table 4.** Main pyrolysis products of lignin at 800°C from PY-GCMS.

| Number | Time (s) | Area (%) | Formula                                       | CAS Number | Remark               |
|--------|----------|----------|-----------------------------------------------|------------|----------------------|
| 1      | 1.70     | 23.90    |                                               |            | Multi-component peak |
| 2      | 1.78     | 2.49     | C <sub>5</sub> H <sub>8</sub> O               | 10229-10-4 |                      |
| 3      | 1.92     | 31.92    |                                               |            | Multi-component peak |
| 4      | 1.96     | 0.17     | C <sub>4</sub> H <sub>6</sub>                 | 590-19-2   | Other                |
| 5      | 2.00     | 0.55     | C <sub>5</sub> H <sub>8</sub>                 | 78-79-5    | Other                |
| 6      | 2.13     | 1.93     | C <sub>5</sub> H <sub>6</sub>                 | 542-92-7   |                      |
| 7      | 2.36     | 0.20     | C <sub>5</sub> H <sub>6</sub>                 | 542-92-7   | Other                |
| 8      | 2.63     | 0.07     | C <sub>6</sub> H <sub>10</sub>                | 513-81-5   | Other                |
| 9      | 2.85     | 0.84     | C <sub>6</sub> H <sub>8</sub>                 | 592-57-4   | Other                |
| 10     | 2.89     | 0.65     | C <sub>6</sub> H <sub>8</sub>                 | 96-39-9    | Other                |
| 11     | 3.12     | 6.05     | C <sub>6</sub> H <sub>6</sub>                 | 71-43-2    |                      |
| 12     | 3.21     | 1.03     | C <sub>4</sub> H <sub>4</sub> S               | 110-02-1   |                      |
| 13     | 4.76     | 5.74     | C <sub>7</sub> H <sub>8</sub>                 | 108-88-3   |                      |
| 14     | 4.84     | 0.56     | C <sub>5</sub> H <sub>6</sub> S               | 616-44-4   | Other                |
| 15     | 4.98     | 0.35     | C <sub>5</sub> H <sub>6</sub> S               | 554-14-3   | Other                |
| 16     | 6.40     | 0.50     | C <sub>8</sub> H <sub>10</sub>                | 100-41-4   | Other                |
| 17     | 6.54     | 1.53     | C <sub>8</sub> H <sub>10</sub>                | 108-38-3   |                      |
| 18     | 6.70     | 0.16     | C <sub>6</sub> H <sub>8</sub> S               | 632-15-5   | Other                |
| 19     | 6.92     | 2.07     | C <sub>8</sub> H <sub>8</sub>                 | 100-42-5   |                      |
| 20     | 8.01     | 0.25     | C <sub>9</sub> H <sub>12</sub>                | 620-14-4   | Other                |
| 21     | 8.31     | 0.28     | C <sub>9</sub> H <sub>10</sub>                | 98-83-9    | Other                |
| 22     | 8.50     | 0.91     | C <sub>9</sub> H <sub>10</sub>                | 611-15-4   | Other                |
| 23     | 8.56     | 0.36     | C <sub>8</sub> H <sub>6</sub> O               | 271-89-6   | Other                |
| 24     | 8.66     | 0.81     | C <sub>6</sub> H <sub>6</sub> O               | 108-95-2   | Other                |
| 25     | 9.22     | 1.84     | C <sub>9</sub> H <sub>8</sub>                 | 95-13-6    |                      |
| 26     | 9.48     | 2.27     | C <sub>7</sub> H <sub>8</sub> O               | 95-48-7    |                      |
| 27     | 9.84     | 0.88     | C <sub>7</sub> H <sub>8</sub> O               | 108-39-4   | Other                |
| 28     | 9.91     | 0.96     | C <sub>9</sub> H <sub>8</sub> O               | 17059-52-8 | Other                |
| 29     | 9.99     | 0.66     | C <sub>8</sub> H <sub>8</sub> N <sub>2</sub>  | 614-97-1   | Other                |
| 30     | 10.07    | 0.89     | C <sub>8</sub> H <sub>10</sub> O              | 576-26-1   | Other                |
| 31     | 10.54    | 0.89     | C <sub>10</sub> H <sub>10</sub>               | 2177-47-1  | Other                |
| 32     | 10.63    | 2.22     | C <sub>10</sub> H <sub>10</sub>               | 767-59-9   |                      |
| 33     | 11.01    | 1.84     | C <sub>10</sub> H <sub>8</sub>                | 91-20-3    |                      |
| 34     | 11.13    | 0.15     | C <sub>8</sub> H <sub>6</sub> S               | 270-82-6   | Other                |
| 35     | 11.14    | 0.18     | C <sub>9</sub> H <sub>10</sub> N <sub>2</sub> | 582-60-5   | Other                |
| 36     | 11.21    | 0.31     | C <sub>9</sub> H <sub>12</sub> O              | 2416-94-6  | Other                |
| 37     | 12.25    | 1.09     | C <sub>11</sub> H <sub>10</sub>               | 91-57-6    |                      |
| 38     | 12.43    | 0.70     | C <sub>11</sub> H <sub>10</sub>               | 90-12-0    | Other                |
| 39     | 13.09    | 0.16     | C <sub>12</sub> H <sub>10</sub>               | 92-52-4    | Other                |
| 40     | 13.37    | 0.18     | C <sub>12</sub> H <sub>12</sub>               | 575-37-1   | Other                |
| 41     | 13.51    | 0.18     | C <sub>12</sub> H <sub>12</sub>               | 571-58-4   | Other                |
| 42     | 13.62    | 0.18     | C <sub>12</sub> H <sub>10</sub>               | 827-54-3   | Other                |
| 43     | 13.86    | 0.44     | C <sub>12</sub> H <sub>8</sub>                | 259-79-0   | Other                |
| 44     | 14.09    | 0.13     | C <sub>13</sub> H <sub>12</sub>               | 644-08-6   | Other                |
| 45     | 15.50    | 0.31     | C <sub>11</sub> H <sub>10</sub> O             | 7469-77-4  | Other                |

**Supplementary Table 5.** Composition and proportion of small molecule products from lignin pyrolysis at 800°C (Split the peaks at retention times of 1.70 and 1.92 in Supplementary Table 4 and Supplementary Fig. 8).

| <b>Number</b> | <b>Time (s)</b> | <b>Area (%)</b> | <b>Formula</b> | <b>CAS Number</b> | <b>Remark</b>        |
|---------------|-----------------|-----------------|----------------|-------------------|----------------------|
| 1             | 1.70            | 23.90           | /              | /                 | Multi-component peak |
| 3             | 1.92            | 31.92           | /              | /                 | Multi-component peak |
| Total         |                 | 55.82           |                |                   |                      |

  

| <b>M/Z</b> | <b>Area (%)</b> | <b>Area (%)</b> | <b>Formula</b>   | <b>CAS Number</b> | <b>Remark</b> |
|------------|-----------------|-----------------|------------------|-------------------|---------------|
| 28         | 31.26           | 17.45           | CO               | 630-08-0          |               |
| 44         | 13.00           | 7.26            | CO <sub>2</sub>  | 124-38-9          |               |
| 18         | 48.54           | 27.09           | H <sub>2</sub> O | 7732-18-5         |               |
| 16         | 7.19            | 4.02            | CH <sub>4</sub>  | 74-82-8           |               |
| Total      | 100             | 55.82           |                  |                   |               |



**Supplementary Table 6.** Comparison of thermal conductivity of our CNT films and CNT films with similar characteristics prepared by the similar method, other biomass-derived carbon materials, as well as common metals.

| <b>Materials</b>           | <b>Thermal conductivity<br/>(W m<sup>-1</sup> K<sup>-1</sup>)</b> | <b>Density (g cm<sup>-3</sup>)</b> | <b>Reference</b> |
|----------------------------|-------------------------------------------------------------------|------------------------------------|------------------|
| Lignin-CNT films           | 33.21                                                             | 0.82                               | Our work         |
| PMMA/CNT                   | 3.44                                                              | 1.18                               | 20               |
| Polycarbonate/CNT          | 1.27                                                              | 1.2                                | 21               |
| Lignin-based carbon foams  | 0.75                                                              | 0.68                               | 22               |
| Lignin-based carbon fibers | 24                                                                | 2.189                              | 23               |
| Lignin-based carbon fibers | 1.8                                                               | 2                                  | 24               |
| Lignin wood                | 0.23                                                              | 1.2                                | 25               |
| Lignin aerogels            | 0.06                                                              | 2.5                                | 26               |
| Ethanol-CNT films          | 20.91-458.58                                                      | 0.37-1.59                          | 27               |
| Silver (Ag)                | 419                                                               | 10.49                              | 28               |
| Copper (Cu)                | 385                                                               | 7.76                               | 28               |
| Aluminum (Al)              | 210                                                               | 2.7                                | 28               |
| Iron (Fe)                  | 76.2                                                              | 7.87                               | 28               |

**Supplementary Table 7.** Comparison of tensile strength and electrical conductivity of lignin-based CNT fibers with other carbon-based fibers and metal materials.

| <b>Materials</b>              | <b>Tensile strength<br/>(GPa)</b> | <b>Electrical<br/>conductivity<br/>(S m<sup>-1</sup>)</b> | <b>Reference</b> |
|-------------------------------|-----------------------------------|-----------------------------------------------------------|------------------|
| Lignin-CNT fibers             | 1.33                              | 1.19×10 <sup>5</sup>                                      | Our work         |
| Biomass-derived carbon fibers | 0.088                             | 1.03×10 <sup>4</sup>                                      | 29               |
| Biomass-derived carbon fibers | 0.369                             | 1.91×10 <sup>4</sup>                                      | 30               |
| Biomass-derived carbon fibers | 0.351                             | 1.41×10 <sup>4</sup>                                      | 31               |
| Biomass-derived carbon fibers | 0.129                             | 5×10 <sup>3</sup>                                         | 32               |
| Biomass-derived carbon fibers | 1.648                             | 1.85×10 <sup>4</sup>                                      | 33               |
| Biomass-derived carbon fibers | 0.763                             | 2×10 <sup>3</sup>                                         | 34               |
| Biomass-derived carbon fibers | 0.59                              | 1×10 <sup>3</sup>                                         | 35               |
| Biomass-derived carbon fibers | 0.57                              | 3×10 <sup>3</sup>                                         | 35               |
| Array CNT fibers              | 0.656                             | 4.08×10 <sup>4</sup>                                      | 36               |
| Array CNT fibers              | 1.408                             | 5.84×10 <sup>4</sup>                                      | 37               |
| Array CNT fibers              | 1.408                             | 2.39×10 <sup>5</sup>                                      | 37               |
| Array CNT fibers              | 1.90                              | 6×10 <sup>4</sup>                                         | 38               |
| Array CNT fibers              | 1.91                              | 4.1×10 <sup>4</sup>                                       | 39               |
| Array CNT fibers              | 0.389                             | 1.05×10 <sup>5</sup>                                      | 11               |
| FCCVD CNT fibers              | 1.0                               | 1.43×10 <sup>5</sup>                                      | 40               |
| FCCVD CNT fibers              | 0.38                              | 4.6 ×10 <sup>5</sup>                                      | 41               |
| FCCVD CNT fibers              | 0.32                              | 2.0×10 <sup>6</sup>                                       | 42               |
| FCCVD CNT fibers              | 0.36                              | 1.27×10 <sup>5</sup>                                      | 9                |

---

|                     |       |                     |    |
|---------------------|-------|---------------------|----|
| FCCVD CNT fibers    | 4.34  | $2.05 \times 10^6$  | 9  |
| FCCVD CNT fibers    | 0.27  | $1.657 \times 10^5$ | 43 |
| FCCVD CNT fibers    | 2.81  | $1.2 \times 10^6$   | 43 |
| Wet-spun CNT fibers | 0.116 | $5 \times 10^5$     | 44 |
| Wet-spun CNT fibers | 1.0   | $2.9 \times 10^6$   | 45 |
| Wet-spun CNT fibers | 1.0   | $5.0 \times 10^6$   | 45 |
| Wet-spun CNT fibers | 2.4   | $8.5 \times 10^6$   | 46 |
| Wet-spun CNT fibers | 4.2   | $1.09 \times 10^7$  | 47 |
| Hexcel (AS4)        | 4.27  | $6.5 \times 10^4$   | 48 |
| Cytec (T300)        | 3.75  | $5.56 \times 10^4$  | 48 |
| Toray (T300)        | 3.53  | $5.9 \times 10^4$   | 48 |
| Toray (T1000G)      | 6.37  | $7.14 \times 10^4$  | 48 |
| Toray (M55J)        | 4.02  | $1.25 \times 10^5$  | 48 |
| Cytec (K-800X)      | 2.34  | $8.83 \times 10^5$  | 48 |
| Cytec (K-1100)      | 3.10  | $9.09 \times 10^5$  | 48 |
| Silver (Ag)         | 0.14  | $6.3 \times 10^7$   | 28 |
| Copper (Cu)         | 0.21  | $5.8 \times 10^7$   | 28 |
| Aluminum (Al)       | 0.1   | $3.5 \times 10^7$   | 28 |
| Iron (Fe)           | 0.54  | $1.0 \times 10^7$   | 28 |

---

**Supplementary Table 8.** Comparison of production rate of CNT fibers from lignin and fine chemicals.

| <b>Methods</b> | <b>Carbon source</b> | <b>Production rate (m h<sup>-1</sup>)</b> | <b>Reference</b> |          |
|----------------|----------------------|-------------------------------------------|------------------|----------|
| FCCVD          | Biomass              | Lignin                                    | 120              | Our work |
| Array          |                      | Acetylene                                 | 60-600           | 49       |
| Wet-spinning   |                      | Methane                                   | 300-540          | 7        |
| FCCVD          |                      | Ethanol                                   | 120-1200         | 9        |
| FCCVD          |                      | Methane                                   | 300              | 50       |
| FCCVD          |                      | Butanol                                   | 300-480          | 51       |
| FCCVD          | Fine                 | Acetone                                   | 300-1800         | 52       |
| FCCVD          | chemicals            | Methane                                   | 330              | 53       |
| FCCVD          |                      | Butanol                                   | 420-540          | 54       |
| FCCVD          |                      | Acetone                                   | 450-540          | 55       |
| FCCVD          |                      | Ethanol                                   | 600              | 56       |
| FCCVD          |                      | Butanol                                   | 600              | 57       |
| FCCVD          |                      | Toluene                                   | 900              | 41       |

**Supplementary Table 9.** Comparison of the amount of ferrocene we used for preparing lignin-based CNT fibers with other literatures.

| <b>Carbon source<br/>(Carrier gas)</b>       | <b>Ferrocene<br/>concentration in<br/>solution (g mL<sup>-1</sup>)</b> | <b>Mass fraction of<br/>ferrocene in<br/>solution (%)</b> | <b>Reference</b> |
|----------------------------------------------|------------------------------------------------------------------------|-----------------------------------------------------------|------------------|
| Lignin (Ar)                                  | 0.005                                                                  | 0.62                                                      | Our work         |
| N-hexane (H <sub>2</sub> +Ar)                | 0.007-0.013                                                            | -                                                         | 58               |
| Xylene+<br>dichlorobenzene (H <sub>2</sub> ) | 0.1                                                                    | -                                                         | 13               |
| Xylene (H <sub>2</sub> +Ar)                  | 0.05                                                                   | -                                                         | 59               |
| Cyclohexane (H <sub>2</sub> )                | 0.02                                                                   | -                                                         | 60               |
| Toluene (H <sub>2</sub> +Ar)                 | 0.03                                                                   | -                                                         | 12               |
| Ethanol (H <sub>2</sub> +Ar)                 | -                                                                      | 0.1-3                                                     | 61               |
| Ethanol (H <sub>2</sub> +N <sub>2</sub> )    | -                                                                      | 0.25-0.4                                                  | 15               |
| Toluene (H <sub>2</sub> )                    | -                                                                      | 1-9.6                                                     | 62               |
| Methane (H <sub>2</sub> )                    | -                                                                      | 0.31-0.89                                                 | 7                |

**Supplementary Table 10.** Composition analysis of lignin.

| <b>Analysis method</b> | <b>Component</b> | <b>Content (%)</b> |
|------------------------|------------------|--------------------|
| Proximate analysis     | Moisture         | 2.3                |
|                        | Ash              | 1.1                |
|                        | Volatiles        | 59                 |
|                        | Fixed carbon     | 37.7               |
| Ultimate analysis      | Carbon           | 61.92              |
|                        | Hydrogen         | 5.68               |
|                        | Oxygen           | 31.92              |
|                        | Nitrogen         | ≤0.05              |
|                        | Sodium           | ≤0.005             |

## Supplementary Figures

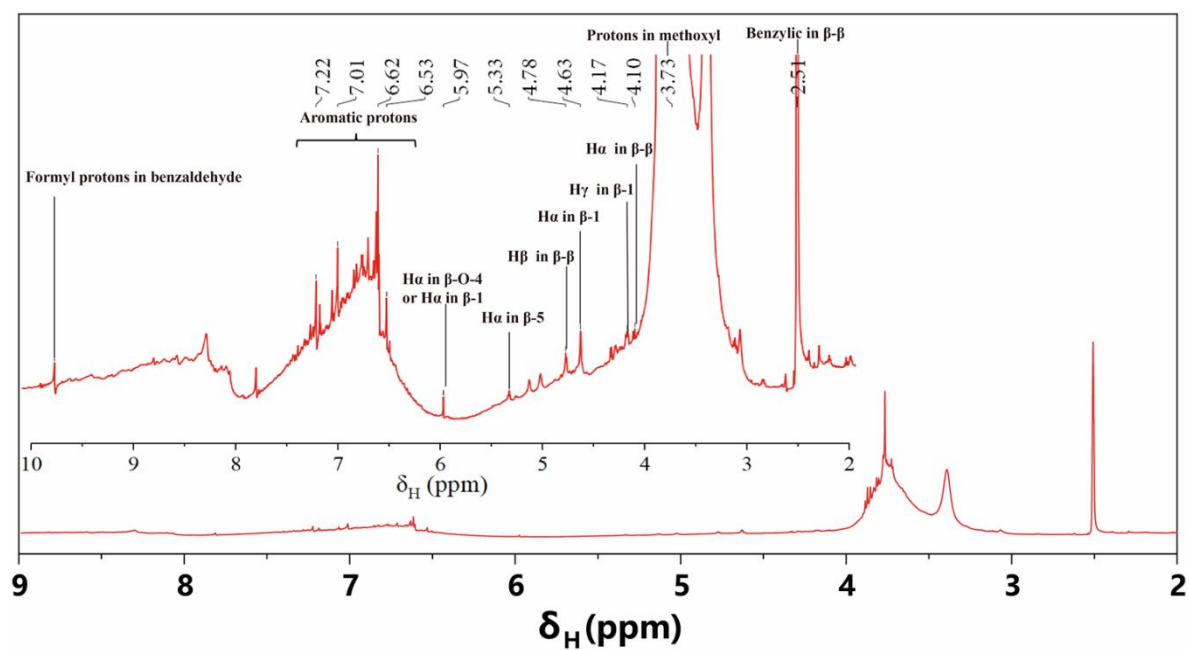

**Supplementary Figure 1.** Quantitative  $^1\text{H}$  NMR spectrum of lignin.

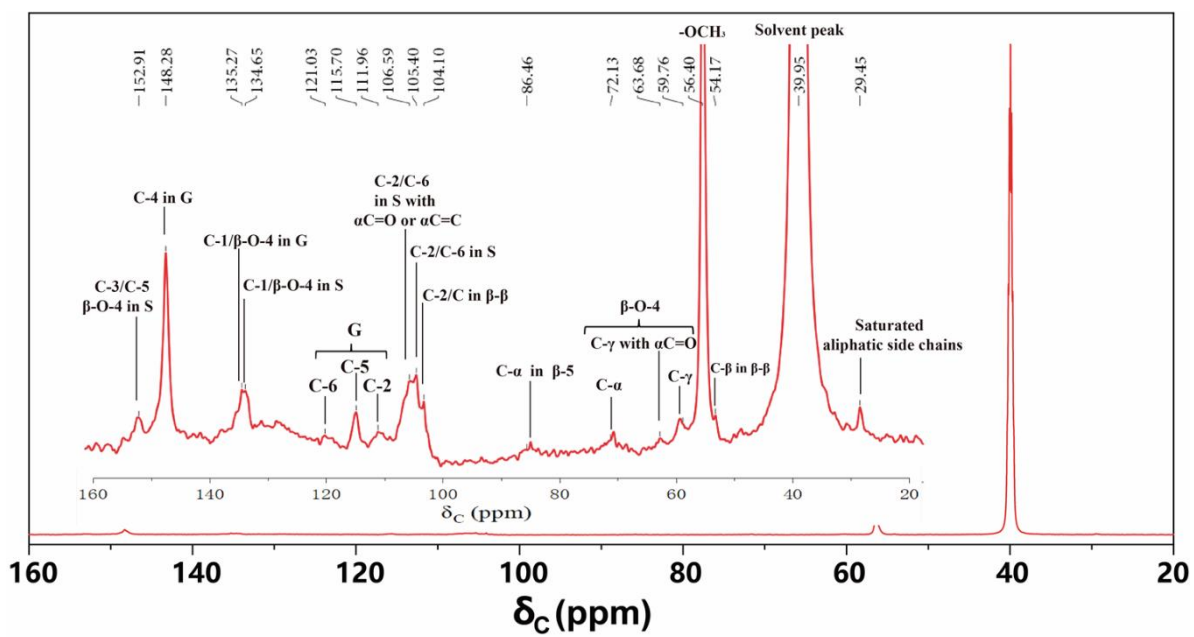

**Supplementary Figure 2.** Quantitative  $^{13}\text{C}$  NMR spectrum of lignin.



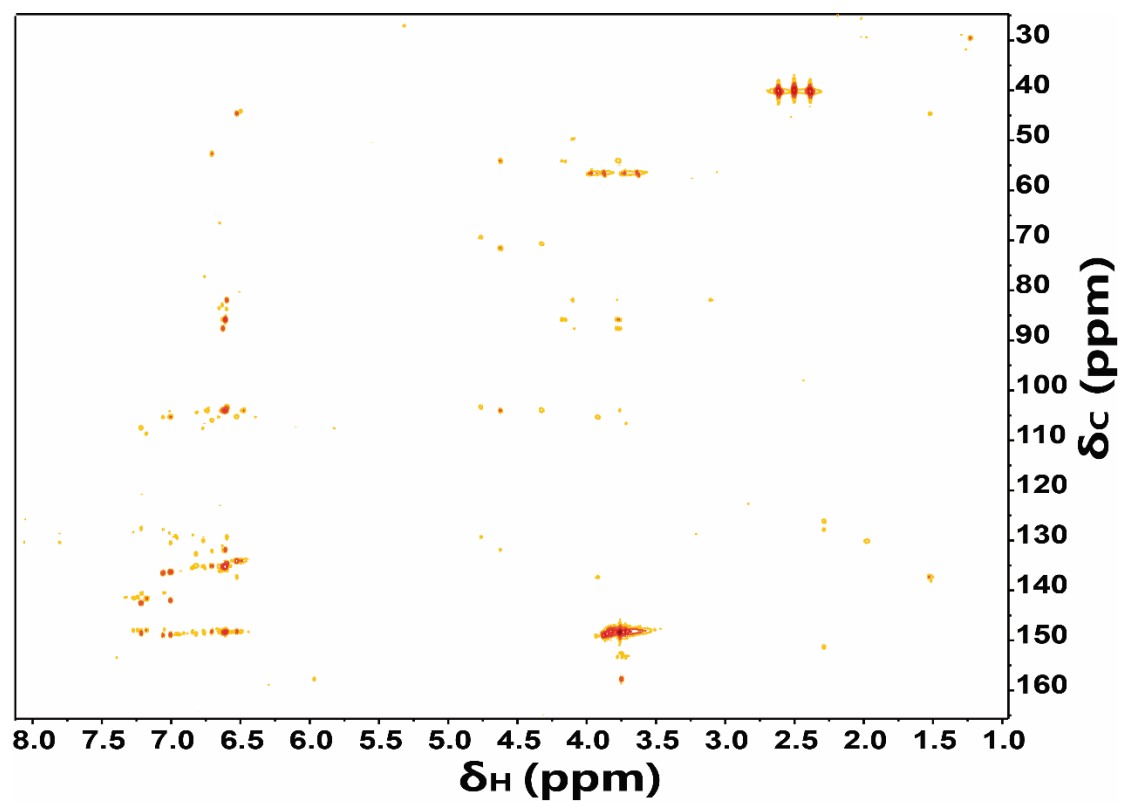

**Supplementary Figure 3.** HMBC spectra (600 MHz with a cryogenic probe, DMSO- $d_6$ ) of lignin.

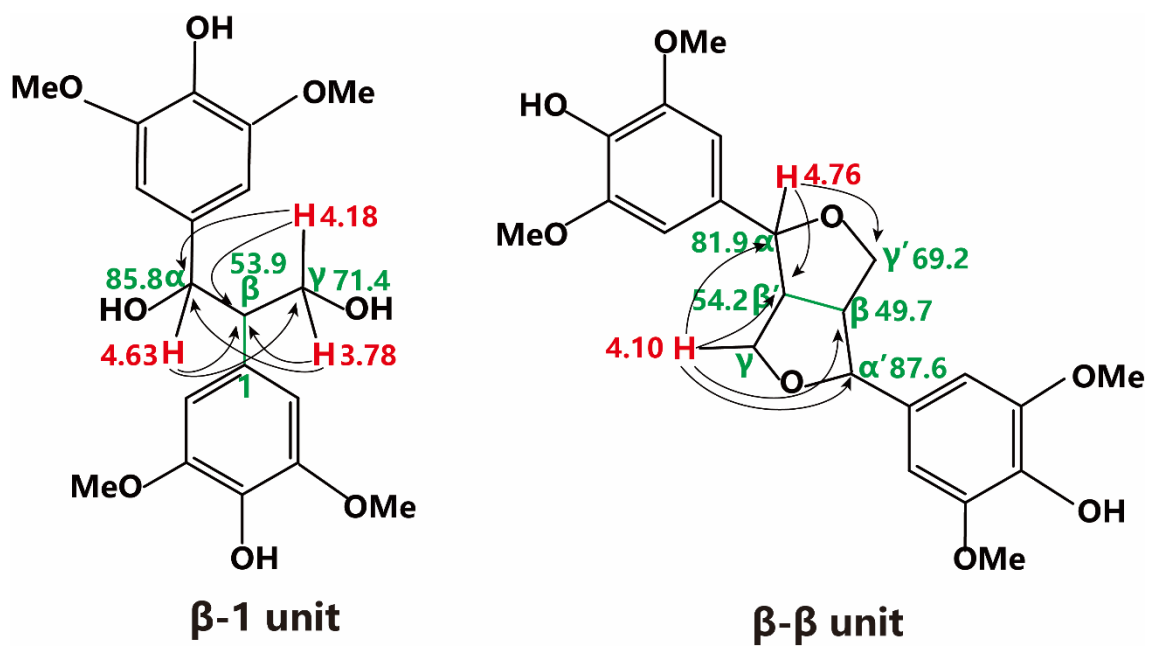

Supplementary Figure 4. Main linkages of lignin obtained from HMBC spectra.

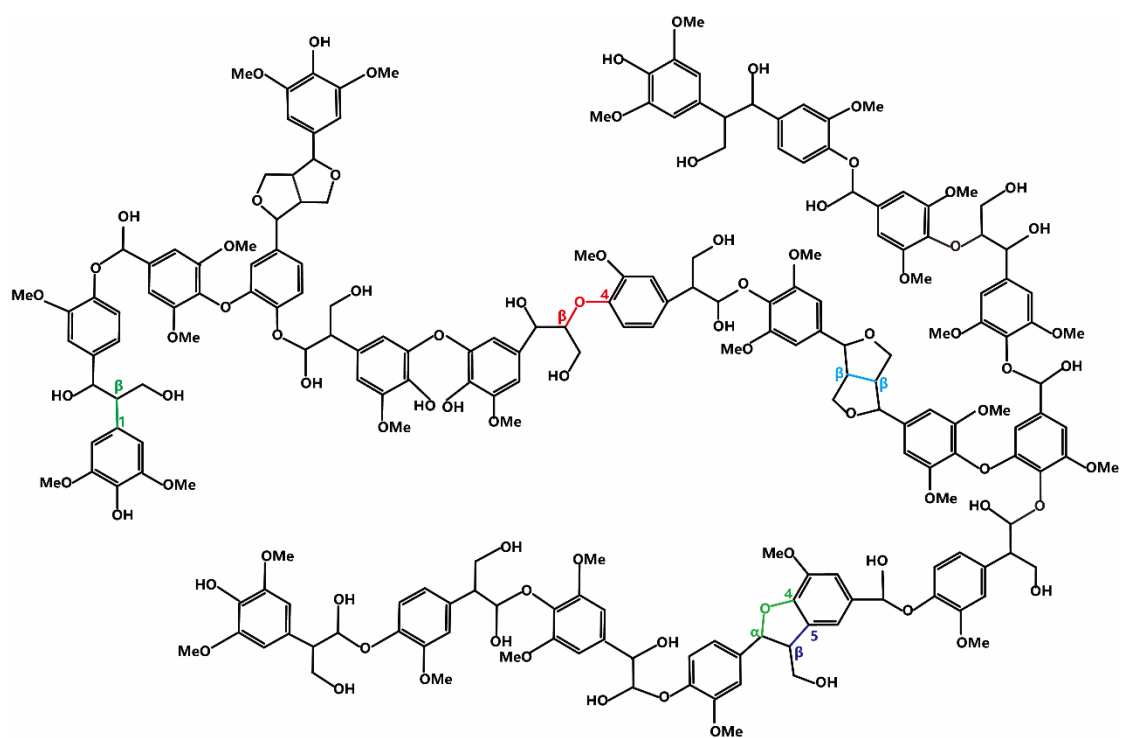

**Supplementary Figure 5.** Molecular structure of lignin deduced from the results of NMR.

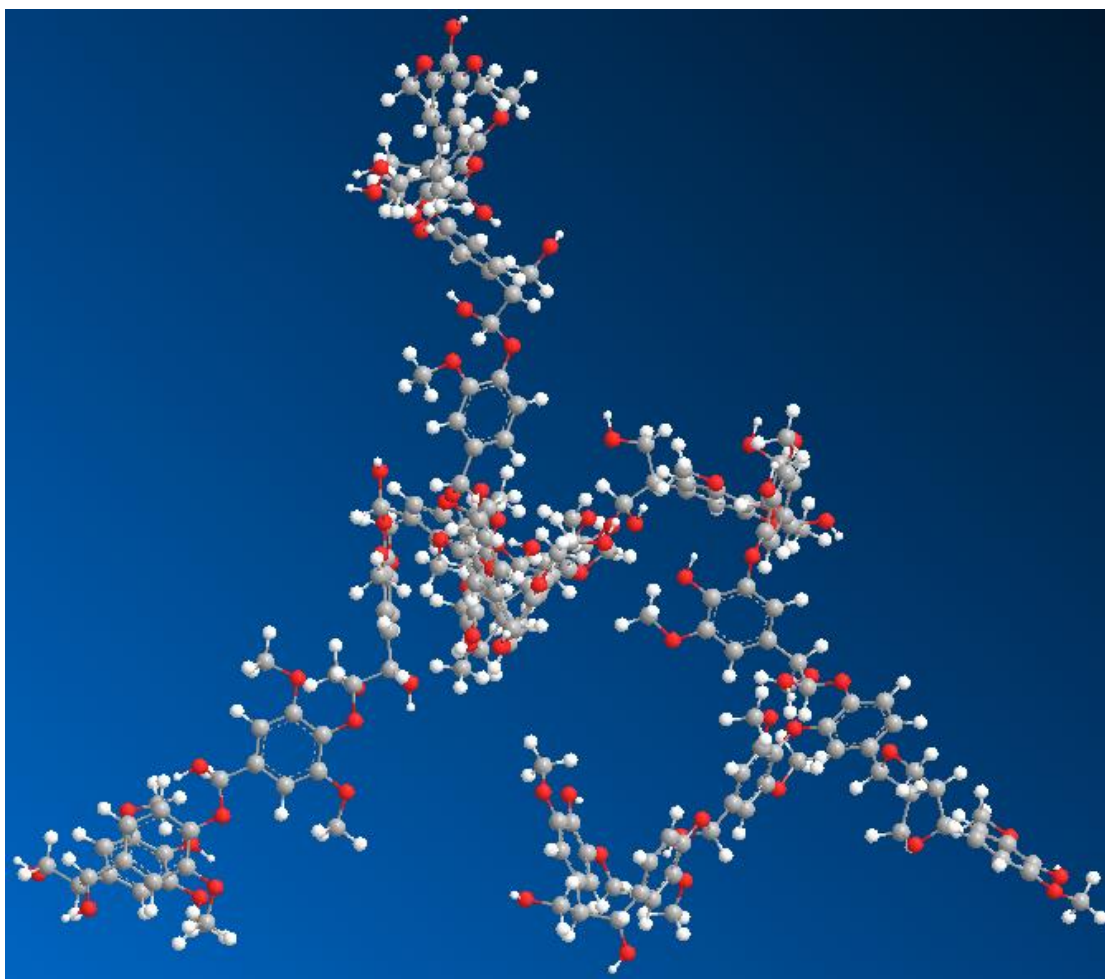

**Supplementary Figure 6.** Three dimensional structure of lignin molecule simulated by ChemDraw software.

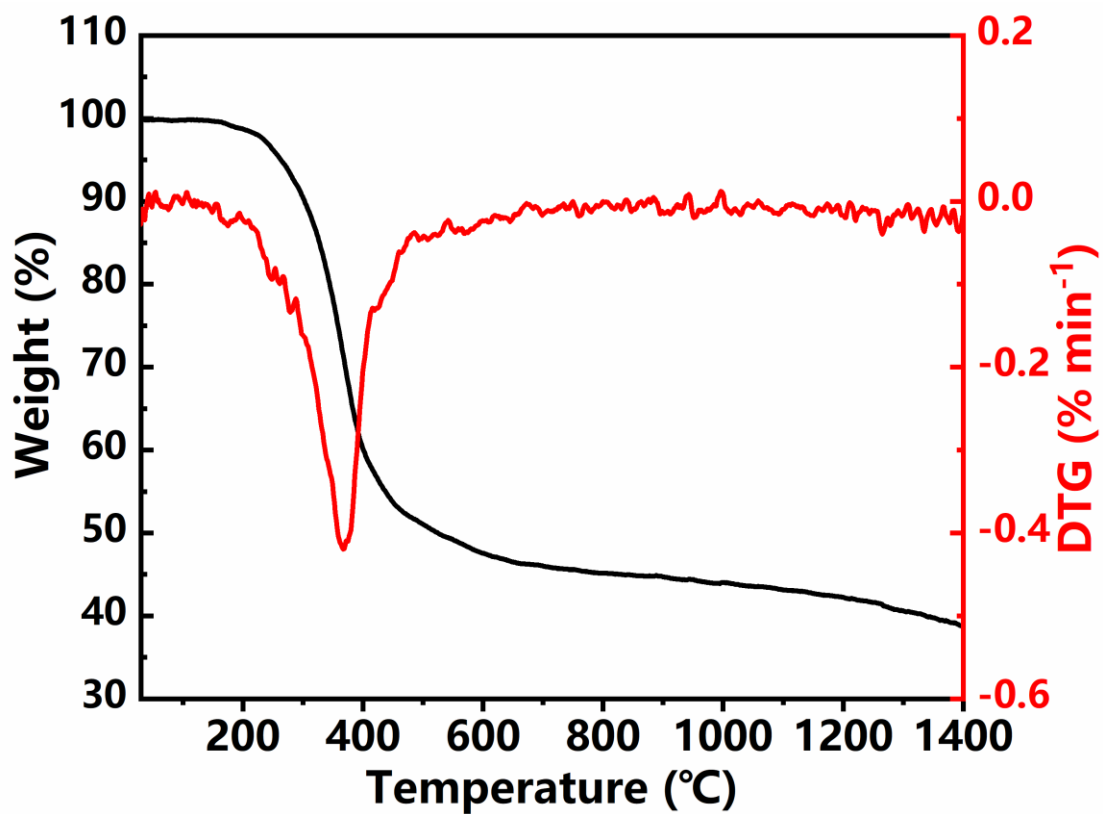

Supplementary Figure 7. Thermogravimetric (TG) analysis of lignin in a nitrogen atmosphere.

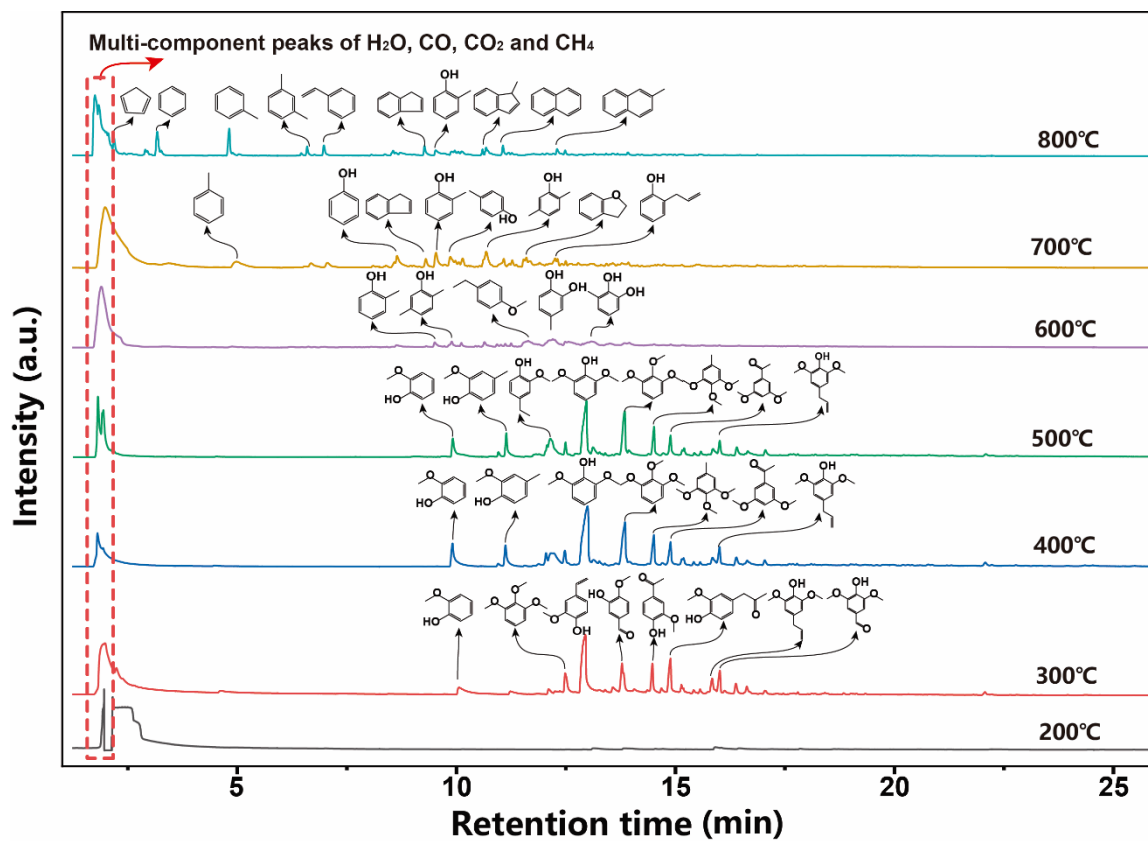

**Supplementary Figure 8.** Pyrolysis products of lignin at different temperatures obtained by pyrolysis gas chromatography mass spectrometry (PY-GCMS).

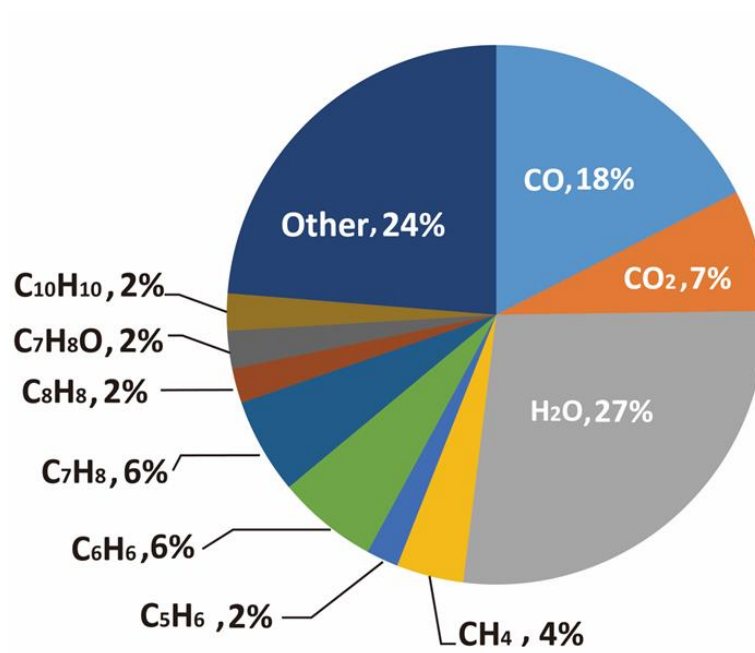

**Supplementary Figure 9.** Main pyrolysis products of lignin at 800°C from PY-GCMS.

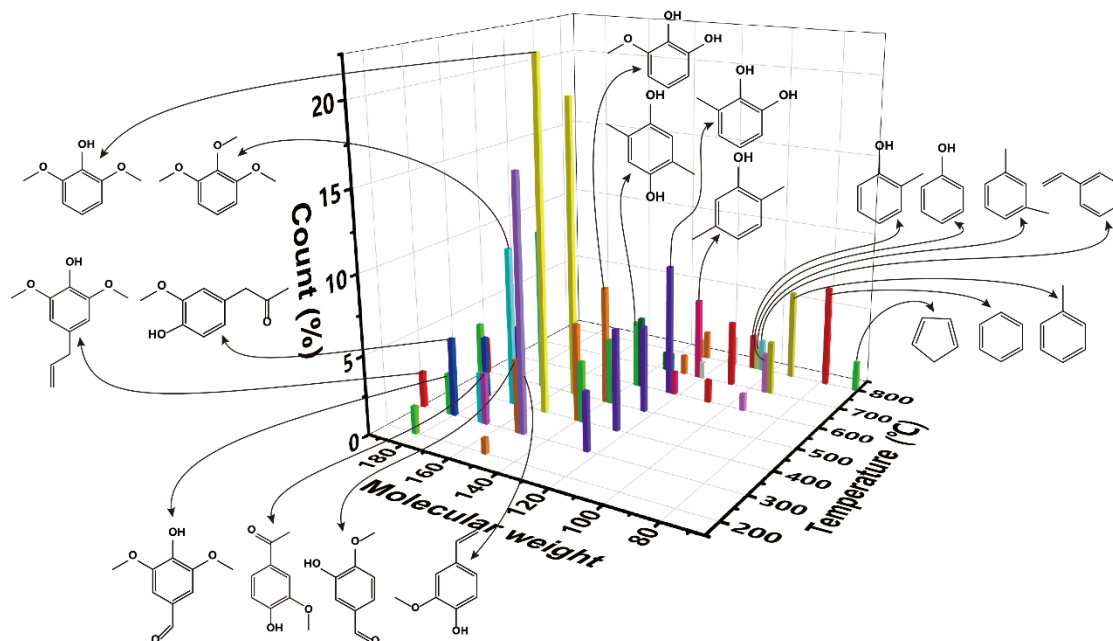

**Supplementary Figure 10.** Main pyrolysis products (aromatic hydrocarbon) of lignin in the temperature range of 200-800°C from PY-GCMS analysis.



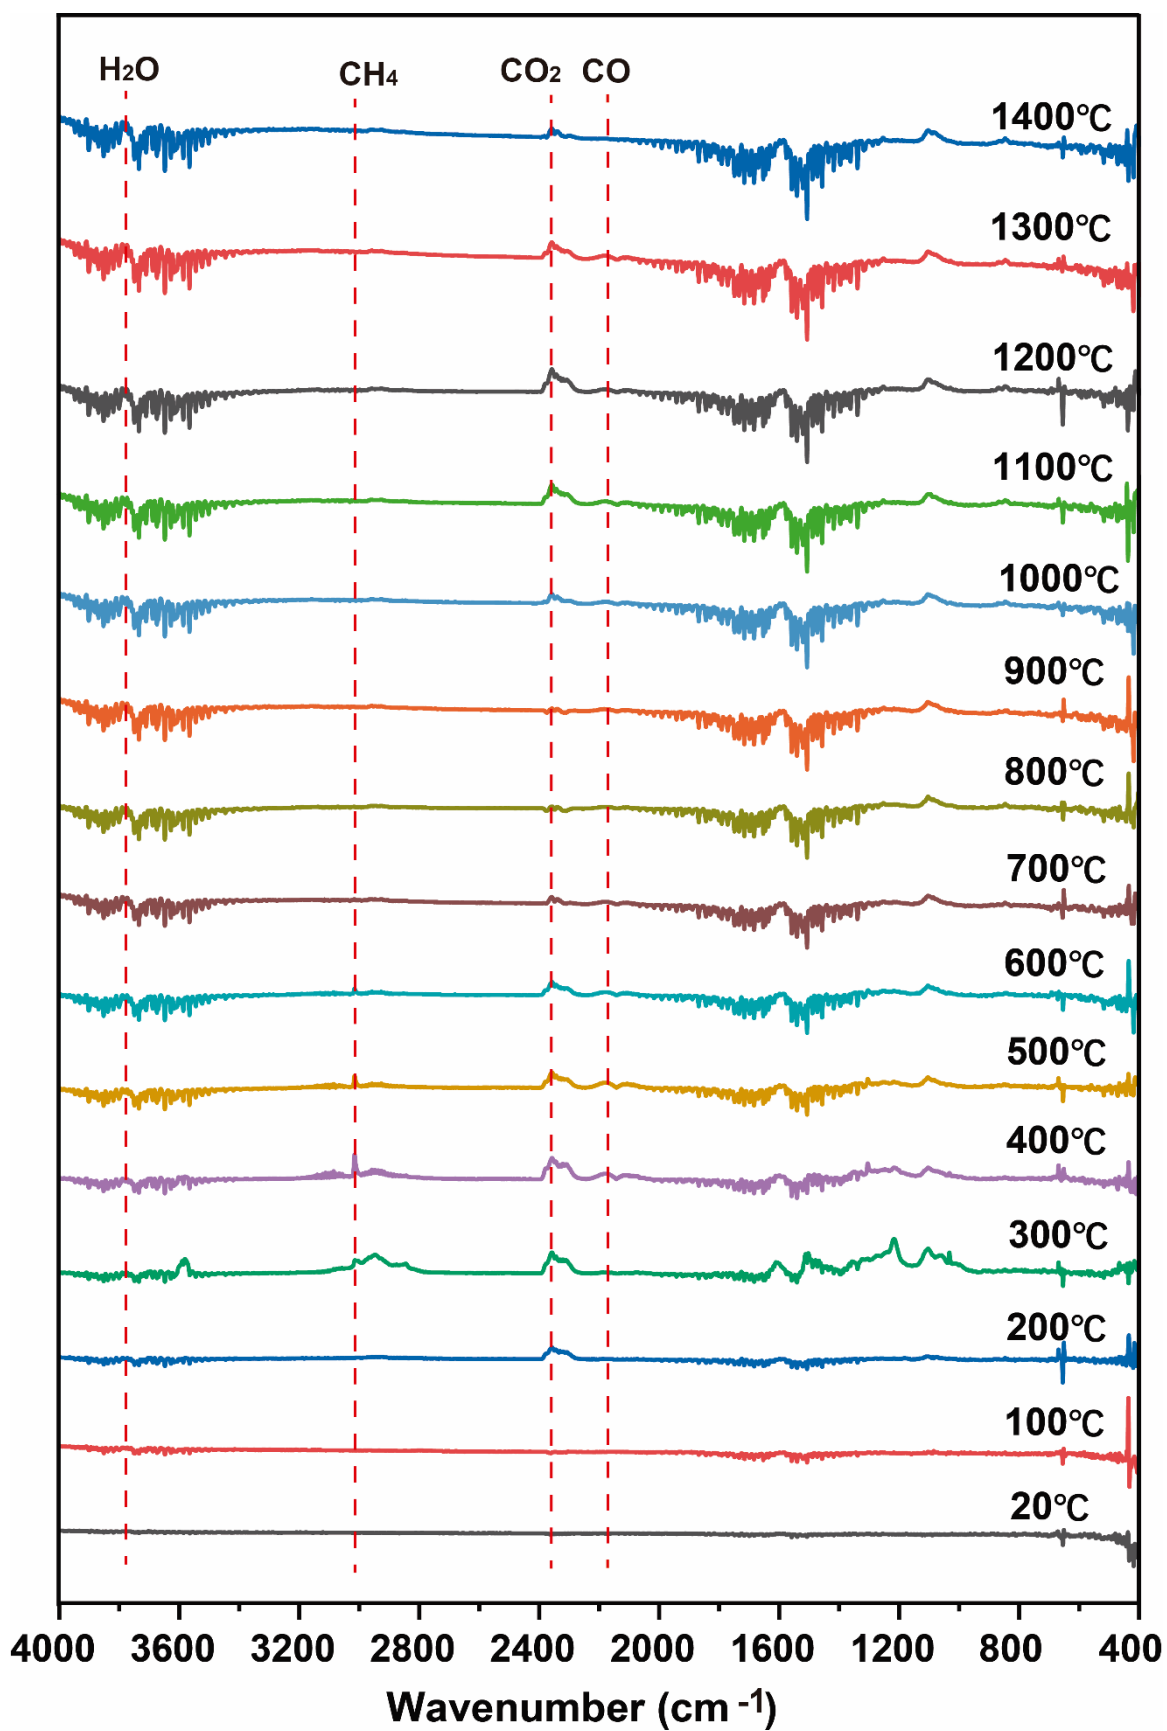

Supplementary Figure 11. FTIR spectra of pyrolysis products of lignin at 20-1400°C.

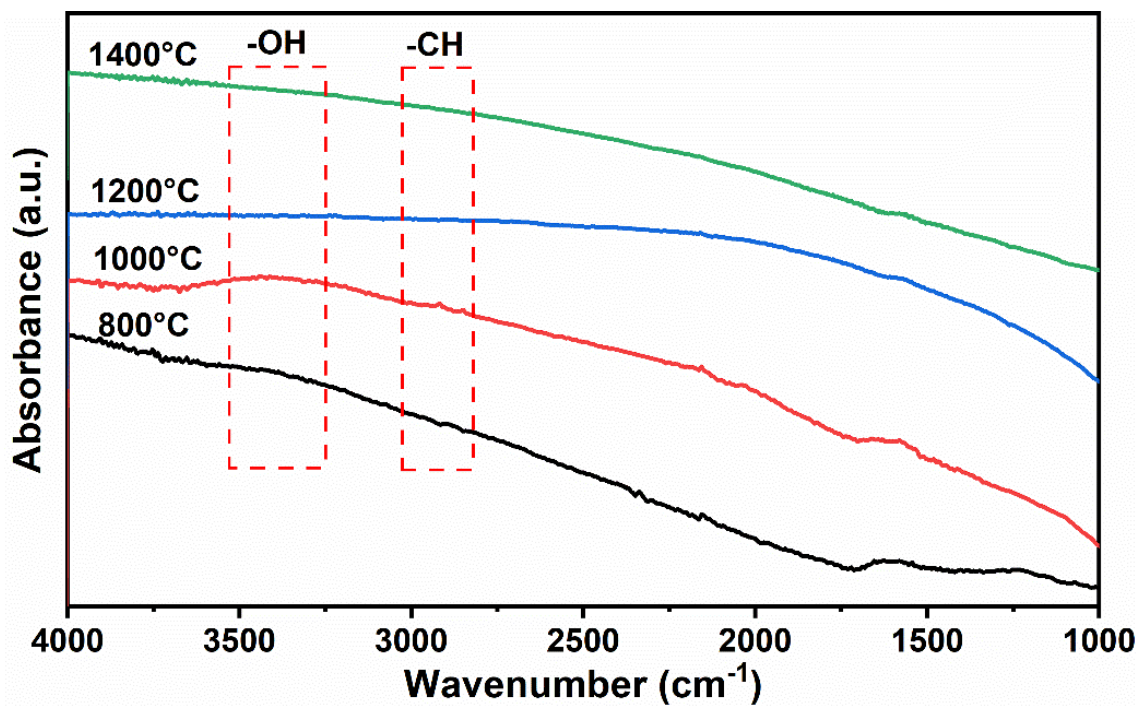

Supplementary Figure 12. FTIR spectra of lignin charcoal at 800-1400°C.

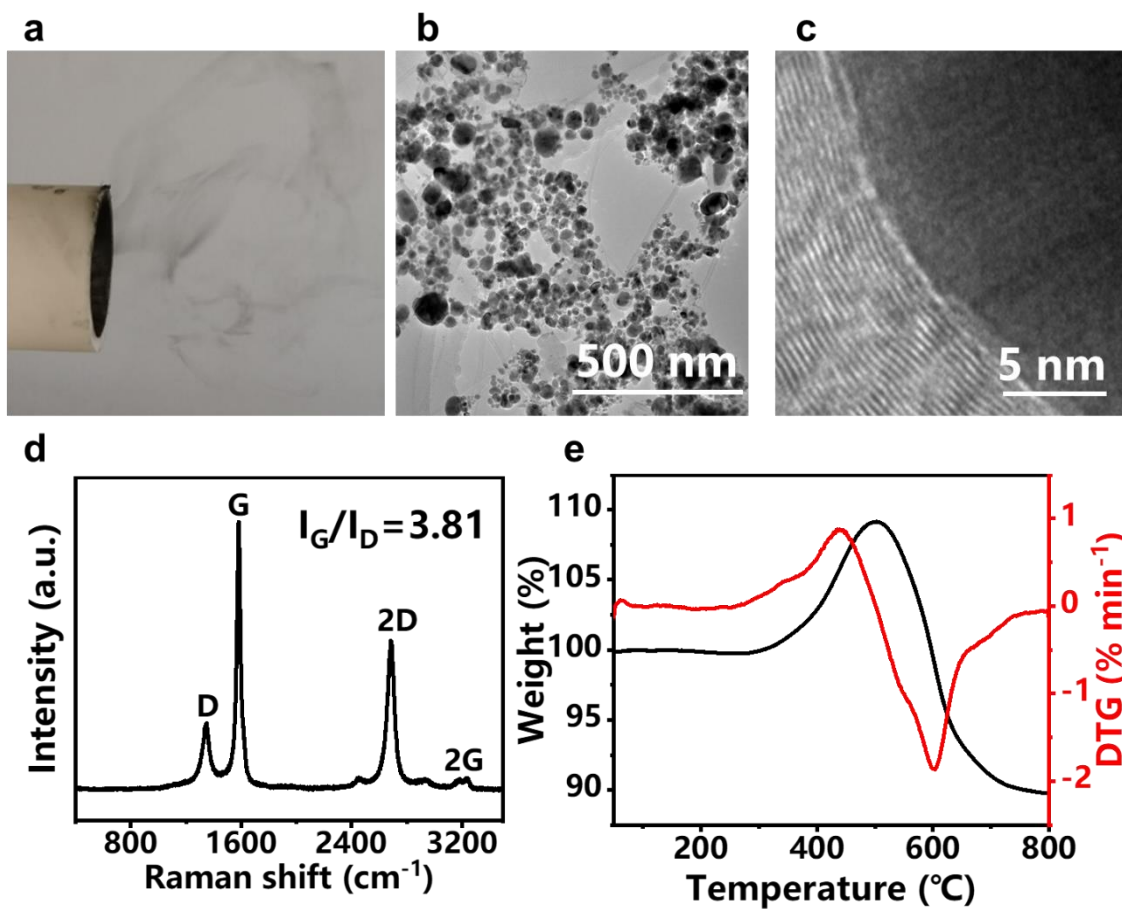

**Supplementary Figure 13. Carbon nanospheres synthesis without sulfur.** **a** Digital image and **b, c** TEM images of the carbon nanospheres. **d** Raman spectrum and **e** TGA of the carbon nanospheres prepared without thiophene addition.

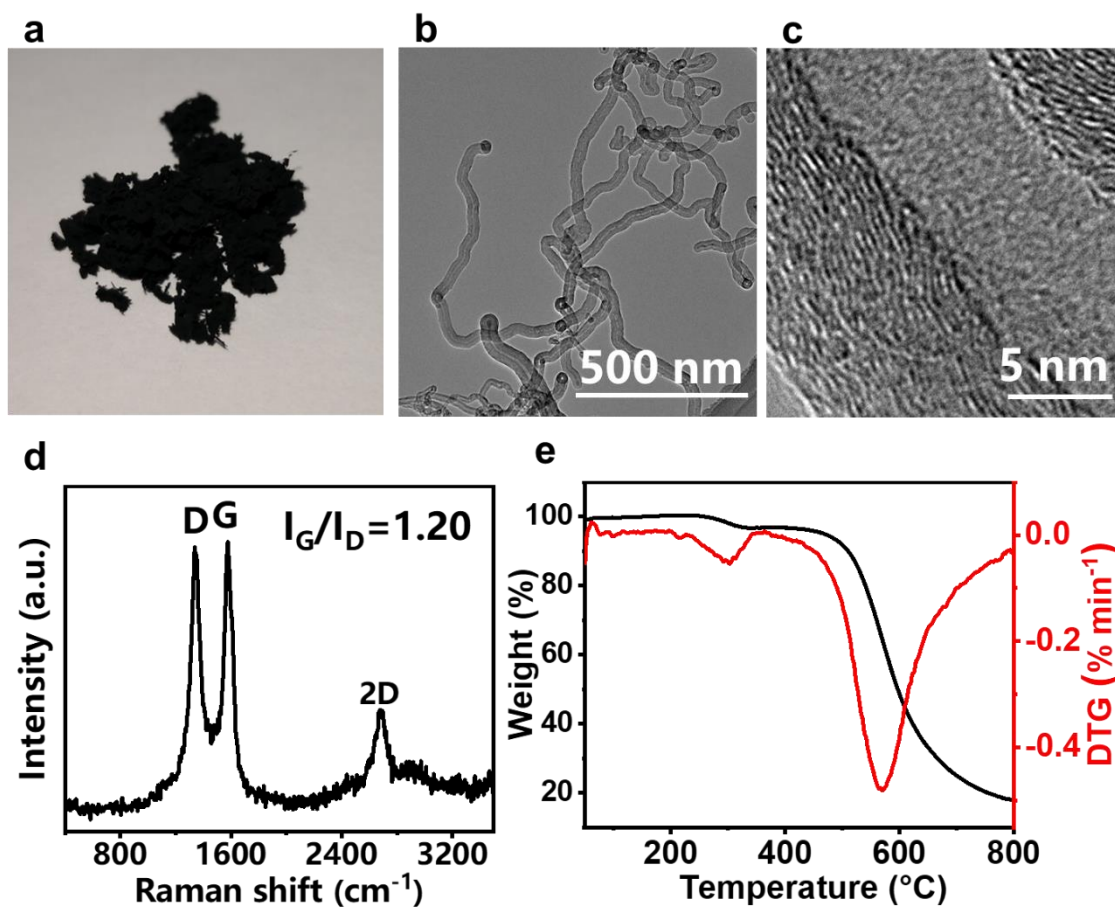

**Supplementary Figure 14. CNT synthesis with excessive sulfur. a** Digital image and **b, c** TEM images of the curled CNTs. **d** Raman spectrum and **e** TGA of the amorphous CNTs prepared with excessive thiophene addition.

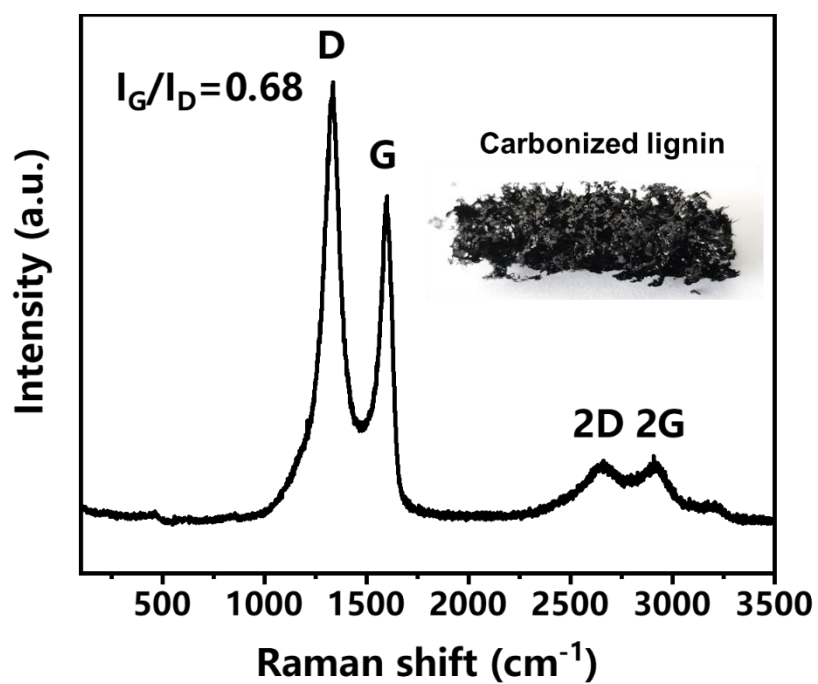

**Supplementary Figure 15.** Raman spectrum of black charcoal from the pyrolysis of solid lignin at 1400°C for 30 min in N<sub>2</sub> atmosphere.

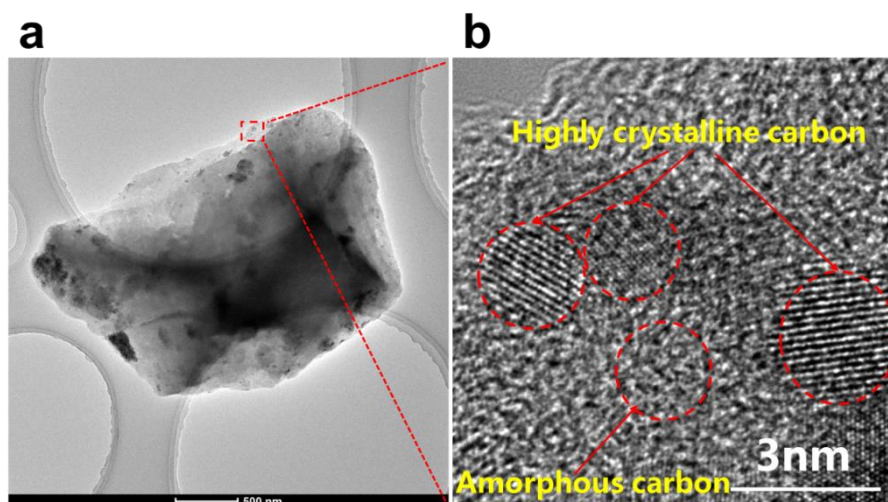

**Supplementary Figure 16. Morphologies of the lignin-derived black charcoal. a** TEM image and **b** enlarged view of black charcoal from the pyrolysis of solid lignin at 1400°C for 30 min in N<sub>2</sub> atmosphere.

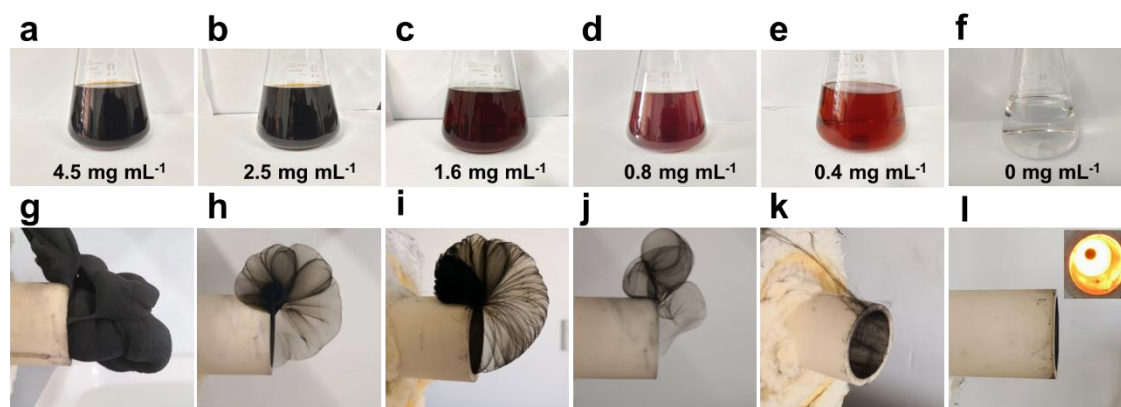

**Supplementary Figure 17. Effect of lignin concentration on the synthesis of CNTs.** Digital images of lignin solutions with concentrations of **a** 5.5 mg mL<sup>-1</sup>, **b** 2.5 mg mL<sup>-1</sup>, **c** 1.6 mg mL<sup>-1</sup>, **d** 0.8 mg mL<sup>-1</sup>, **e** 0.4 mg mL<sup>-1</sup>, **f** 0 mg mL<sup>-1</sup>. Digital images showing the synthesis of CNTs from lignin solutions with concentrations of **g** 5.5 mg mL<sup>-1</sup>, **h** 2.5 mg mL<sup>-1</sup>, **i** 1.6 mg mL<sup>-1</sup>, **j** 0.8 mg mL<sup>-1</sup>, **k** 0.4 mg mL<sup>-1</sup>, **l** 0 mg mL<sup>-1</sup>.



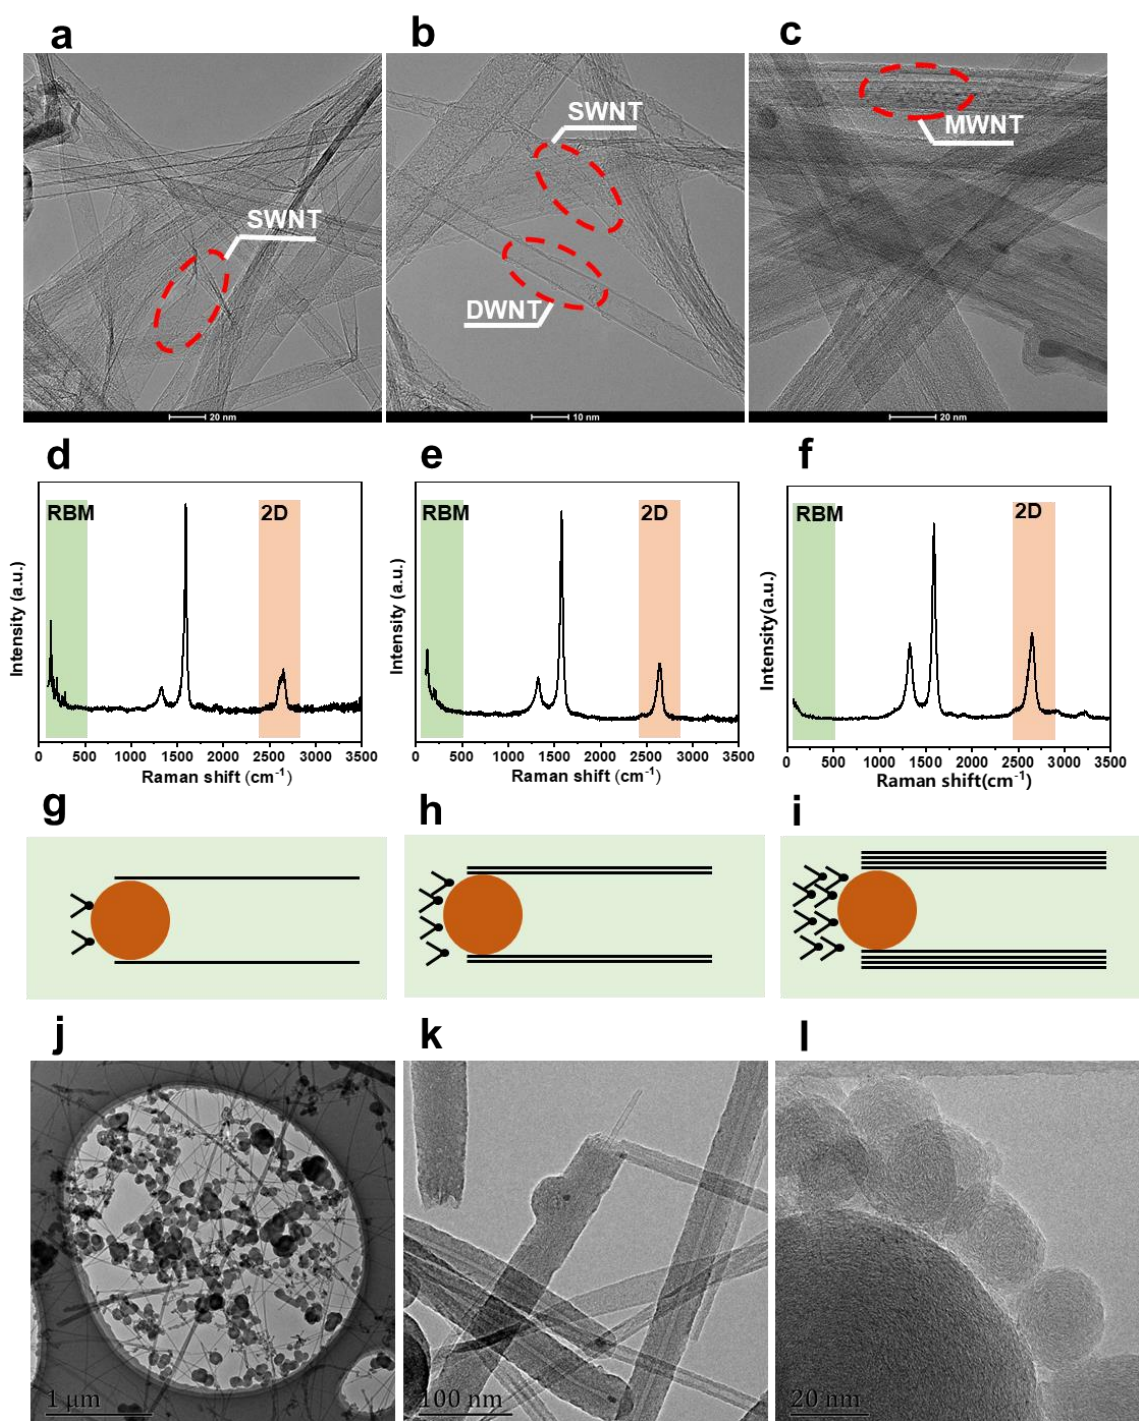

**Supplementary Figure 18. Effect of lignin concentration on the morphologies of CNTs. a** TEM image, **d** Raman spectrum, **g** growth mechanism of the CNTs prepared with lignin concentration of  $0.4 \text{ mg mL}^{-1}$ . **b** TEM image, **e** Raman spectrum, **h** growth mechanism of the CNTs prepared with lignin concentration of  $0.8 \text{ mg mL}^{-1}$ . **c** TEM image, **f** Raman spectrum, **i** growth mechanism of the CNTs prepared with lignin concentration of  $2.5 \text{ mg mL}^{-1}$ . TEM



images of the **j** CNT aggregates prepared with lignin concentration of  $5.5 \text{ mg mL}^{-1}$ , and enlarged images of **k** carbon nanorods and **l** amorphous carbon spheres.

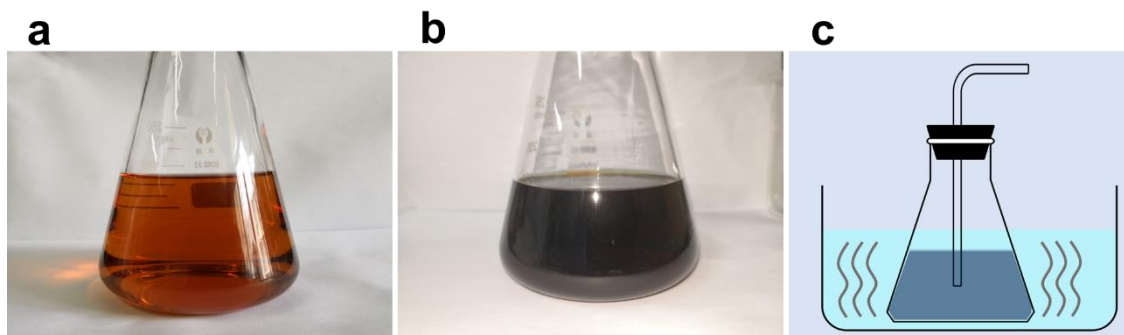

**Supplementary Figure 19.** Digital images of lignin solutions with a concentration of **a** 0.5 mg mL<sup>-1</sup>, and **b** 6 mg mL<sup>-1</sup>. **c** Schematic showing the oscillation of high-concentration lignin solutions during CNT synthesis.

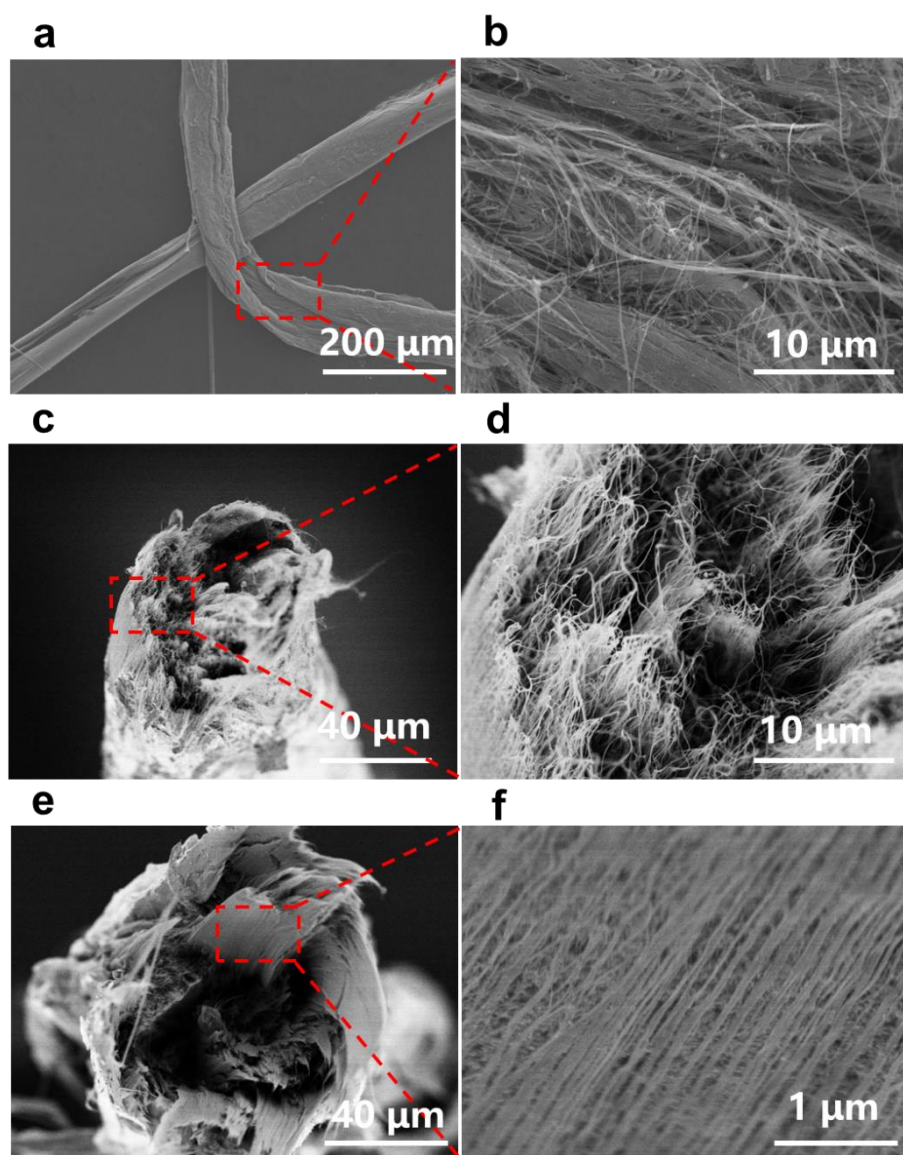

**Supplementary Figure 20. Morphologies of the nascent CNT fibers, twisted CNT fibers and rolled CNT fibers. a** SEM image of the CNT aggregate and **b** magnified SEM image. **c** Cross-sectional SEM image of the twisted CNT fibers and **d** magnified SEM image. **e** Cross-sectional SEM image of the rolled CNT fibers and **f** magnified SEM image.

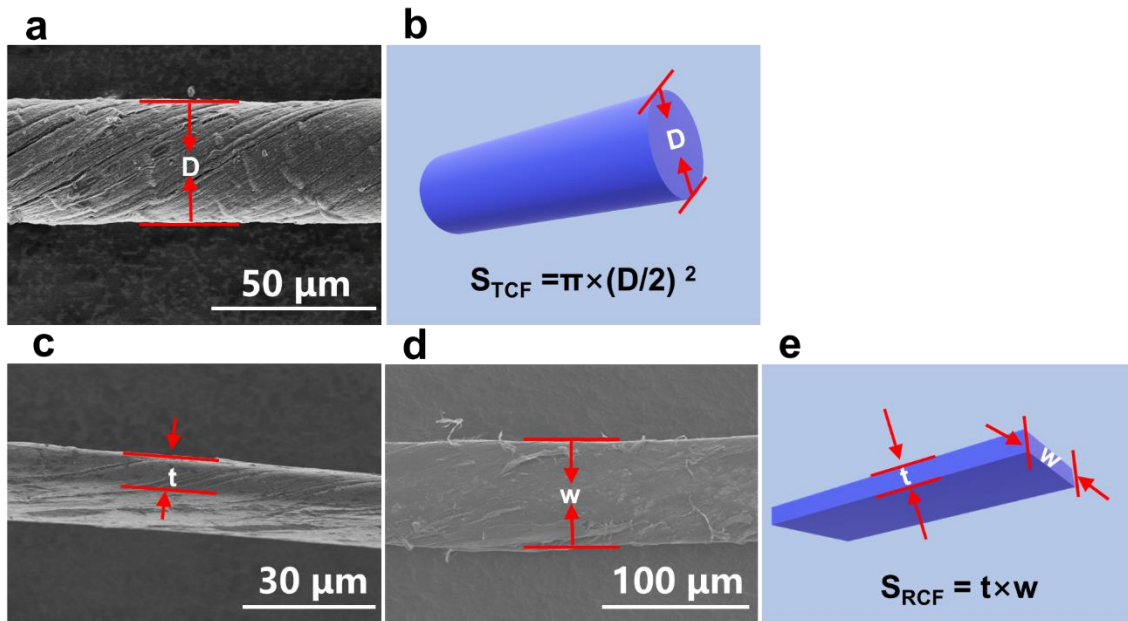

**Supplementary Figure 21.** **a** SEM image and **b** calculation model of the TCFs. **c, d** SEM images and **e** calculation model of the RCFs.

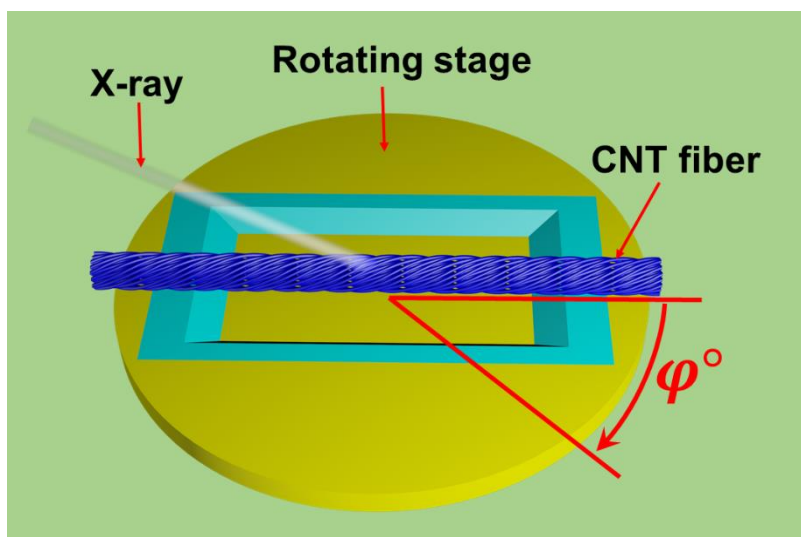

**Supplementary Figure 22.** Schematic diagram for the determination of the fiber orientation by WAXD azimuthal scanning.

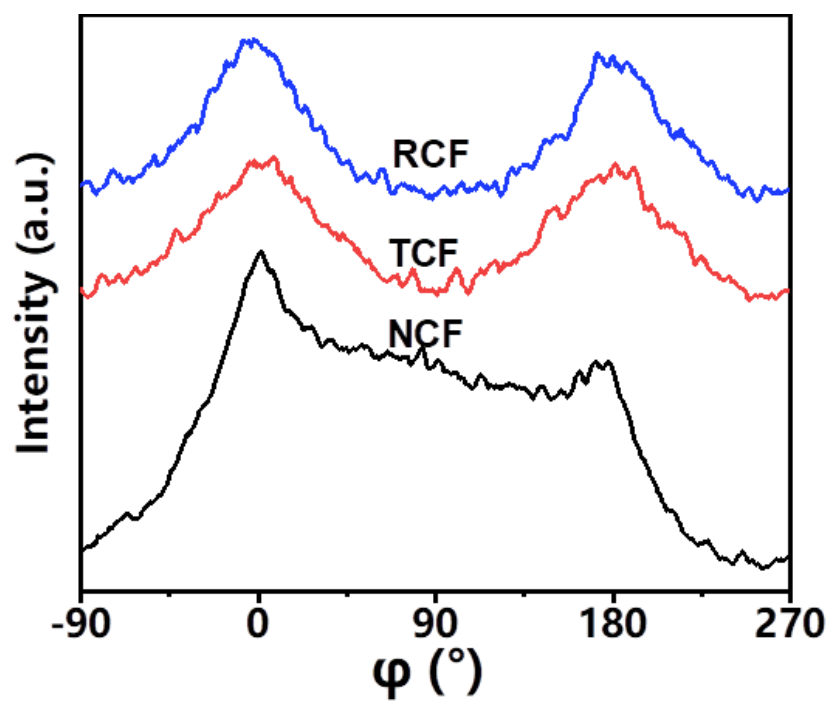

**Supplementary Figure 23.** WAXD azimuthal scanning of the NCFs, TCFs and RCFs.

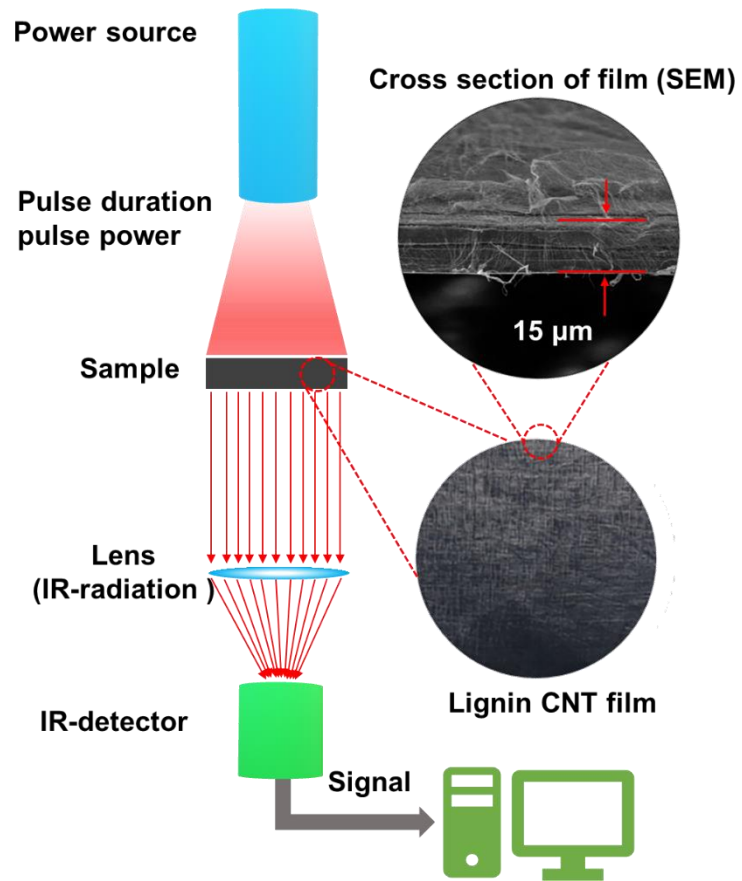

**Supplementary Figure 24.** Schematic showing the thermal conductivity measurement of the CNT films.

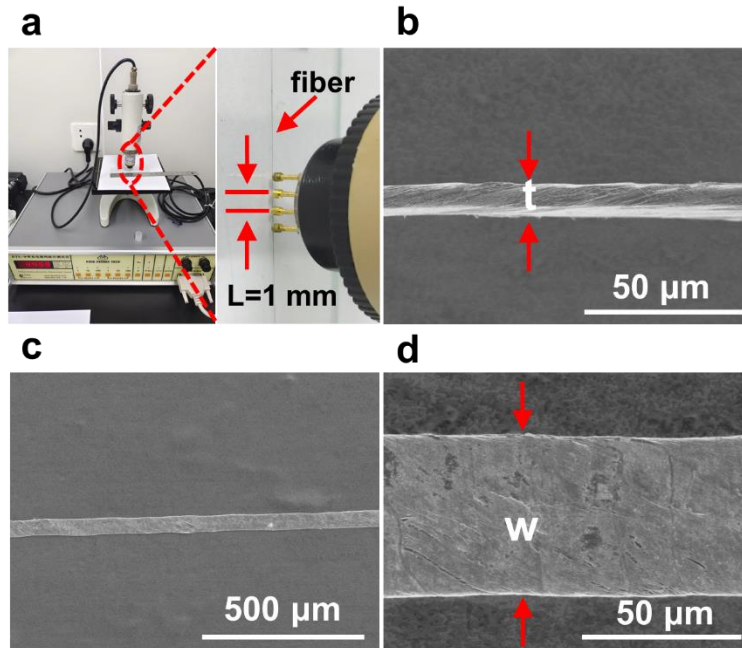

**Supplementary Figure 25. Electrical conductivity test of the CNT fibers using four-probe method.** **a** Digital image showing the electrical conductivity measurement by four-probe method. **b** SEM image of the CNT fibers to show the thickness ( $t$ ). **c, d** SEM images of the CNT fibers to show the width ( $w$ ).



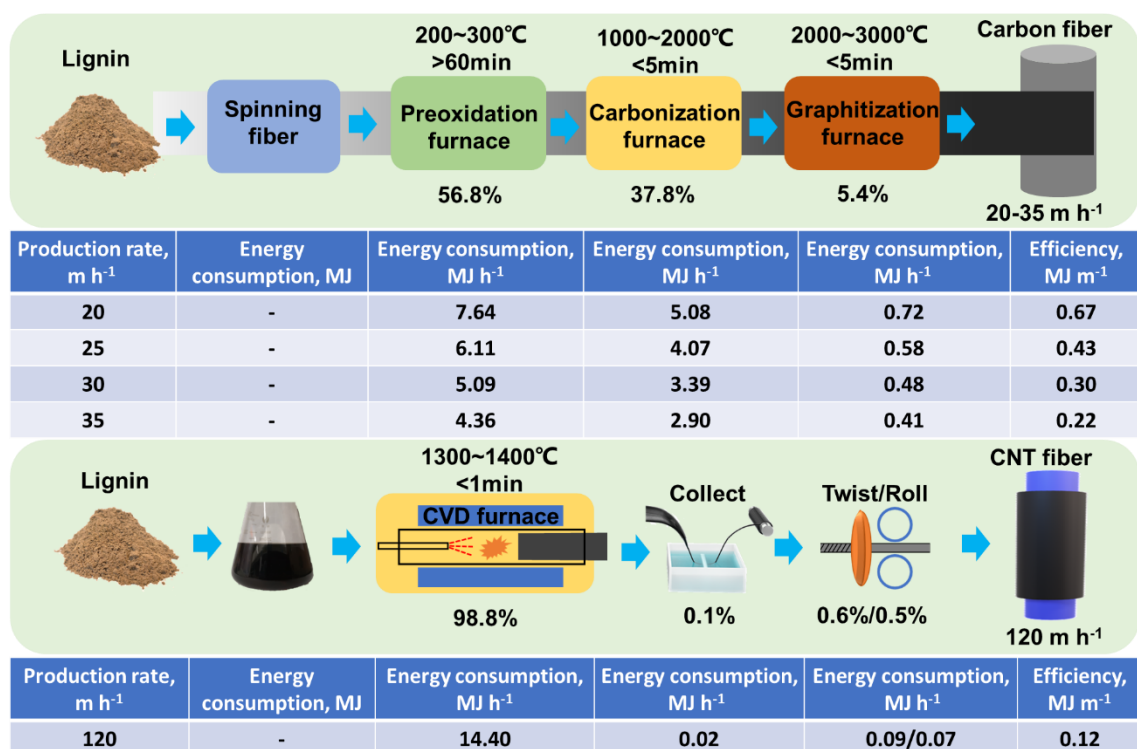

**Supplementary Figure 26.** Comparison of energy consumption between lignin-based CNT fibers prepared by FCCVD method in our work and lignin-based carbon fibers prepared by conventional spinning method<sup>63, 64</sup>.

**Note:** For the preparation of carbon fibers, the high-temperature processing part includes pretreatment, carbonization and graphitization, and the data of its energy consumption referred to the research report of Deakin University<sup>63, 64</sup>. For the preparation of our CNT fibers, the energy consumption is mainly in the pyrolysis part of lignin. The pyrolysis of lignin is carried out in a tubular furnace (GSL-1400X, Hefei kejing Material Technology Co., Ltd., China) with a power of 4 KW, which consumes at most 14.4 MJ of energy per hour. For the post-treatment process of CNT fibers, the energy consumption is mainly concentrated in fiber collection, twisting and rolling. An optical axis motor (2GN-18K-50K, rated power=6 W) from Taizhou Weichuang Electromechanical Equipment Co., Ltd. was used for fiber collection, and the energy consumption was 0.02 MJ h<sup>-1</sup>. A yarn twist meter (Y331A, rated power≤25 W) from Changzhou Yifangyi Spinning Instrument Co., Ltd. was used for fiber twisting, and the energy

consumption was  $0.09 \text{ MJ h}^{-1}$ . A small automatic roll-to-roll machine (MSK-HRP-04-RD, maximum power=20 W) from Hefei Kejing Material Technology Co., Ltd. was used for fiber rolling, and the energy consumption was  $0.07 \text{ MJ h}^{-1}$ .

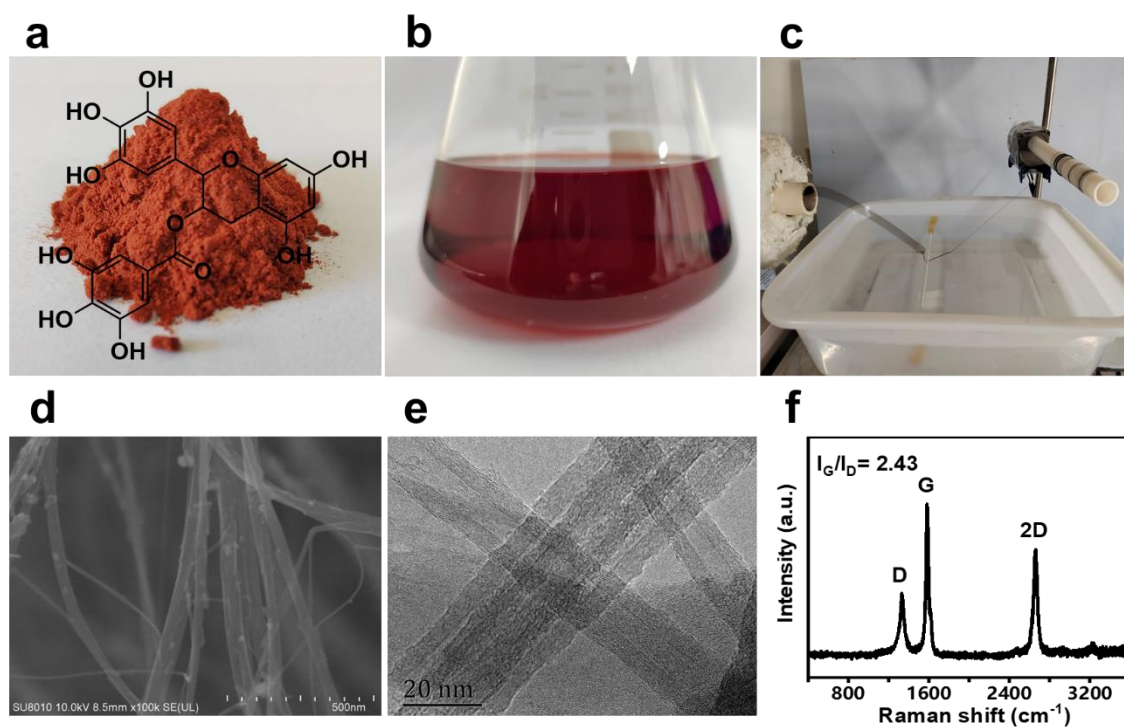

**Supplementary Figure 27. Preparation and structures of CNT fibers from tea polyphenols.** Digital images of **a** tea polyphenol powder and **b** its methanol solution. **c** Digital image showing the continuous preparation of CNT fibers from tea polyphenols. **d** SEM image, **e** TEM image and **f** Raman spectrum of the CNTs.

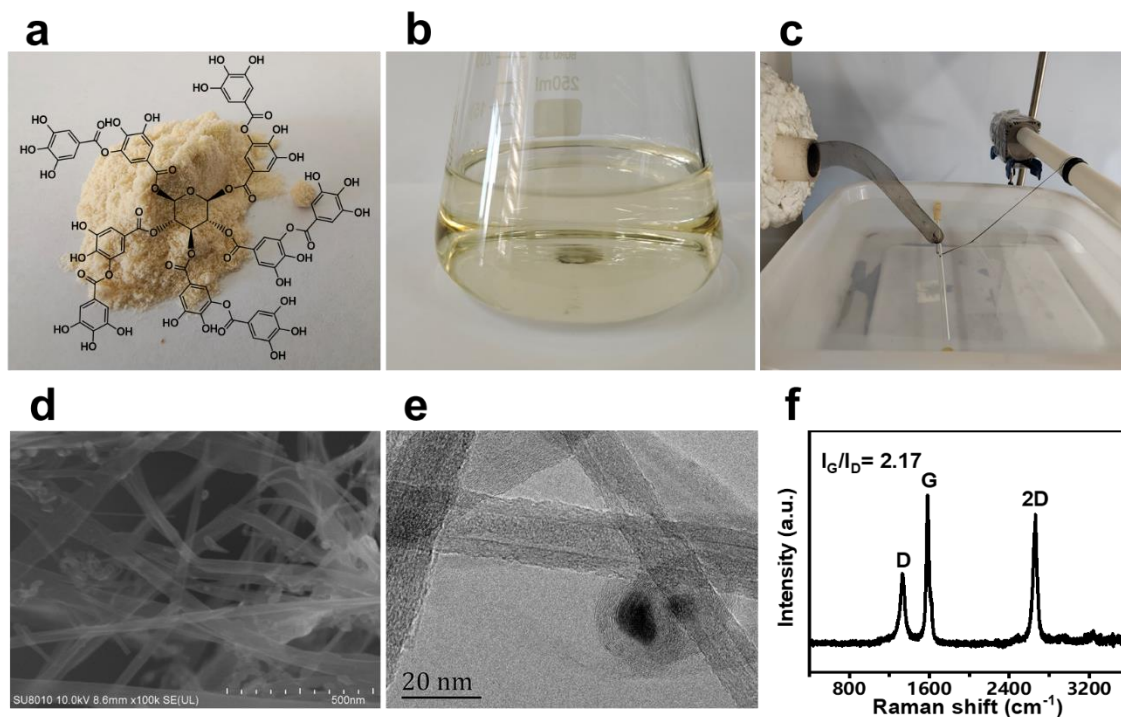

**Supplementary Figure 28. Preparation and structures of CNT fibers from tannic acid.**

Digital images of **a** tannic acid powder and **b** its methanol solution. **c** Digital image showing the continuous preparation of CNT fibers from tannic acid. **d** SEM image, **e** TEM image and **f** Raman spectrum of the CNTs.

## Supplementary References

1. Ghosh, P., Afre, R. A., Soga, T. & Jimbo, T. A simple method of producing single-walled carbon nanotubes from a natural precursor: eucalyptus oil. *Mater. Lett.* **61**, 3768-3770 (2007).
2. Ghosh, P. et al. Vertically aligned carbon nanotubes from natural precursors by spray pyrolysis method and their field electron emission properties. *Appl. Phys.* **94**, 51-56 (2009).
3. Kumar, R., Singh, R. K. & Tiwari, R. Growth analysis and high-yield synthesis of aligned-stacked branched nitrogen-doped carbon nanotubes using sesame oil as a natural botanical hydrocarbon precursor. *Mater. Des.* **94**, 166-175 (2016).
4. Kang, Z., Wang, E., Mao, B., Su, Z., Chen, L. & Xu, L. Obtaining carbon nanotubes from grass. *Nanotechnology* **16**, 1192 (2005).
5. Xie, X. et al. A method for producing carbon nanotubes directly from plant materials. *Forest. Prod. J.* **59**, 26–28 (2009).
6. Qu, J., Cong, Q., Luo, C. & Yuan, X. Adsorption and photocatalytic degradation of bisphenol a by low-cost carbon nanotubes synthesized using fallen leaves of poplar. *RSC Adv.* **3**, 961-965 (2013).
7. Lee, J. et al. Direct spinning and densification method for high-performance carbon nanotube fibers. *Nat. Commun.* **10**, 1-10 (2019).
8. Hou, G. F. et al. Gas phase pyrolysis synthesis of carbon nanotubes at high temperature. *Mater. Des.* **132**, 112-118 (2017).
9. Wang, J. N., Luo, X. G., Wu, T. & Chen, Y. High-strength carbon nanotube fibre-like ribbon with high ductility and high electrical conductivity. *Nat. Commun.* **5**, 3848 (2014).
10. Paukner, C. & Koziol, K. K. Ultra-pure single wall carbon nanotube fibres continuously spun without promoter. *Sci. Rep.* **4**, 1-7 (2014).

11. Watanabe, T. et al. Post-synthesis treatment improves the electrical properties of dry-spun carbon nanotube yarns. *Carbon* **185**, 314-323 (2021).
12. Abdullah, H. B., Irmawati, R., Ismail, I. & Yusof, N. A. Direct synthesis of carbon nanotube aerogel using floating catalyst chemical vapor deposition: effect of gas flow rate. *Chem. Pap.* **74**, 3359-3365 (2020).
13. Yang, X. et al. Enhanced catalytic activity of carbon nanotubes for the oxidation of cyclohexane by filling with Fe, Ni, and FeNi alloy nanowires. *Aust. J. Chem.* **69**, 689-695 (2015).
14. Lee, S. H. et al. Synthesis of carbon nanotube fibers from carbon precursors with low decomposition temperatures using a direct spinning process. *Carbon* **124**, 219-227 (2017).
15. Ding, E. X. et al. Highly conductive and transparent single-walled carbon nanotube thin films from ethanol by floating catalyst chemical vapor deposition. *Nanoscale* **9**, 17601-17609 (2017).
16. Khabushev, E. M., Krasnikov, D. V., Kolodiaznaia, J. V., Bubis, A. V. & Nasibulin, A. G. Structure-dependent performance of single-walled carbon nanotube films in transparent and conductive applications. *Carbon* **161**, 712-717 (2020).
17. Moon, S. Y., Kim, B. R., Park, C. W., Lee, S. H. & Kim, S. M. High-crystallinity single-walled carbon nanotube aerogel growth: Understanding the real-time catalytic decomposition reaction through floating catalyst chemical vapor deposition. *Chem. Eng. J. Adv.* **10**, 100261 (2022).
18. Lee, S. H. et al. Deep-injection floating-catalyst chemical vapor deposition to continuously synthesize carbon nanotubes with high aspect ratio and high crystallinity. *Carbon* **173**, 901-909 (2021).
19. Romanov, S. A., Alekseeva, A. A., Khabushev, E. M., Krasnikov, D. V. & Nasibulin, A. G. Rapid, efficient, and non-destructive purification of single-walled carbon nanotube

- films from metallic impurities by Joule heating. *Carbon* **168**, 193-200 (2020).
20. Hong, W.-T. & Tai, N.-H. Investigations on the thermal conductivity of composites reinforced with carbon nanotubes. *Diamond Relat. Mater.* **17**, 1577-1581 (2008).
  21. Kim, H. S., Jang, J.-u., Yu, J. & Kim, S. Y. Thermal conductivity of polymer composites based on the length of multi-walled carbon nanotubes. *Composites, Part B* **79**, 505-512 (2015).
  22. Yan, Q., Arango, R., Li, J. & Cai, Z. Fabrication and characterization of carbon foams using 100% Kraft lignin. *Mater. Des.* **201**, 109460 (2021).
  23. Liu, J. et al. Thermal conductivity and annealing effect on structure of lignin-based microscale carbon fibers. *Carbon* **121**, 35-47 (2017).
  24. Wang, R. et al. Anisotropic thermal conductivities and structure in lignin-based microscale carbon fibers. *Carbon* **147**, 58-69 (2019).
  25. Li, Y., Fu, Q., Rojas, R., Yan, M., Lawoko, M. & Berglund, L. Lignin-retaining transparent wood. *ChemSusChem* **10**, 3445-3451 (2017).
  26. Grishchko, L. I., Amaral-Labat, G. i., Szczurek, A., Fierro, V., Kuznetsov, B. N. & Celzard, A. Lignin-phenol-formaldehyde aerogels and cryogels. *Microporous Mesoporous Mater.* **168**, 19-29 (2013).
  27. Zhan, H., Chen, Y. W., Shi, Q. Q., Zhang, Y., Mo, R. W. & Wang, J. N. Highly aligned and densified carbon nanotube films with superior thermal conductivity and mechanical strength. *Carbon* **186**, 205-214 (2022).
  28. The Online Materials Information Resource, <http://www.matweb.com/>.
  29. Wang, L. et al. Conductive carbon microfibers derived from wet-spun lignin/nanocellulose hydrogels. *ACS Sustainable Chem. Eng.* **7**, 6013-6022 (2019).
  30. Nowak, A. P. et al. Lignin-based carbon fibers for renewable and multifunctional lithium-ion battery electrodes. *Holzforschung* **72**, 81-90 (2018).

31. Li, Q. et al. Microstructure defines the electroconductive and mechanical performance of plant-derived renewable carbon fiber. *Chem. Commun.* **55**, 12655-12658 (2019).
32. Prauchner, M. J., Pasa, V. M. D., Otani, S. & Otani, C. Biopitch-based general purpose carbon fibers: processing and properties. *Carbon* **43**, 591-597 (2005).
33. Kinumoto, T., Matsumura, T., Yamaguchi, K., Matsuoka, M., Tsumura, T. & Toyoda, M. Material processing of bamboo for use as a gas diffusion layer in proton exchange membrane fuel cells. *ACS Sustainable Chem. Eng.* **3**, 1374-1380 (2015).
34. Torres-Canas, F. et al. Improved structure and highly conductive lignin-carbon fibers through graphene oxide liquid crystal. *Carbon* **163**, 120-127 (2020).
35. Wang, Q., Wang, C., Zhang, M., Jian, M. & Zhang, Y. Feeding single-walled carbon nanotubes or graphene to silkworms for reinforced silk fibers. *Nano Lett.* **16**, 6695-6700 (2016).
36. Xu, G., Zhao, J., Li, S., Zhang, X., Yong, Z. & Li, Q. Continuous electrodeposition for lightweight, highly conducting and strong carbon nanotube-copper composite fibers. *Nanoscale* **3**, 4215-4219 (2011).
37. Zhao, J. et al. Vibration-assisted infiltration of nano-compounds to strengthen and functionalize carbon nanotube fibers. *Carbon* **101**, 114-119 (2016).
38. Zhang, X. et al. Ultrastrong, stiff, and lightweight carbon-nanotube fibers. *Adv. Mater.* **19**, 4198-4201 (2007).
39. Zhang, X. et al. Strong carbon-nanotube fibers spun from long carbon-nanotube arrays. *small* **3**, 244-248 (2007).
40. Zhu, H., Xu, C., Wu, D., Wei, B., Vajtai, R. & Ajayan, P. Direct synthesis of long single-walled carbon nanotube strands. *Science* **296**, 884-886 (2002).
41. Tran, T. Q. et al. Purification and dissolution of carbon nanotube fibers spun from the floating catalyst method. *ACS Appl. Mater. Interfaces* **9**, 37112-37119 (2017).



42. Zhao, Y., Wei, J., Vajtai, R., Ajayan, P. M. & Barrera, E. V. Iodine doped carbon nanotube cables exceeding specific electrical conductivity of metals. *Sci. Rep.* **1**, 1-5 (2011).
43. Tran, T. Q., Fan, Z., Liu, P., Myint, S. M. & Duong, H. M. Super-strong and highly conductive carbon nanotube ribbons from post-treatment methods. *Carbon* **99**, 407-415 (2016).
44. Ericson, L. M. et al. Macroscopic, neat, single-walled carbon nanotube fibers. *Science* **305**, 1447-1450 (2004).
45. Behabtu, N. et al. Strong, light, multifunctional fibers of carbon nanotubes with ultrahigh conductivity. *Science* **339**, 182-186 (2013).
46. Tsentelovich, D. E. et al. Influence of carbon nanotube characteristics on macroscopic fiber properties. *ACS Appl. Mater. Interfaces* **9**, 36189-36198 (2017).
47. Taylor, L. W. et al. Improved properties, increased production, and the path to broad adoption of carbon nanotube fibers. *Carbon* **171**, 689-694 (2021).
48. Liu, Y. & Kumar, S. Recent progress in fabrication, structure, and properties of carbon fibers. *Polym. Rev.* **52**, 234-258 (2012).
49. Miao, M. Production, structure and properties of twistless carbon nanotube yarns with a high density sheath. *Carbon* **50**, 4973-4983 (2012).
50. Lee, S.-H., Park, J., Moon, S. Y., Lee, S. Y. & Kim, S. M. Strong and highly conductive carbon nanotube fibers as conducting wires for wearable electronics. *ACS Appl. Nano Mater.* **4**, 3833-3842 (2021).
51. Alemán, B., Reguero, V., Mas, B. & Vilatela, J. J. Strong carbon nanotube fibers by drawing inspiration from polymer fiber spinning. *ACS nano* **9**, 7392-7398 (2015).
52. Zhou, T. et al. The synergetic relationship between the length and orientation of carbon nanotubes in direct spinning of high-strength carbon nanotube fibers. *Mater. Des.* **203**, 109557 (2021).

53. Lee, S.-H. et al. Deep-injection floating-catalyst chemical vapor deposition to continuously synthesize carbon nanotubes with high aspect ratio and high crystallinity. *Carbon* **173**, 901-909 (2021).
54. Reguero, V., Alemán, B., Mas, B. & Vilatela, J. J. Controlling carbon nanotube type in macroscopic fibers synthesized by the direct spinning process. *Chem. Mater.* **26**, 3550-3557 (2014).
55. Song, J., Kim, S., Yoon, S., Cho, D. & Jeong, Y. Enhanced spinnability of carbon nanotube fibers by surfactant addition. *Fibers Polym.* **15**, 762-766 (2014).
56. Karaeva, A. R., Kazennov, N. V., Zhukova, E. A. & Mordkovich, V. Z. Carbon nanotubes by continuous growth, pulling and harvesting into big spools. *Mater. Today: Proc.* **5**, 25951-25955 (2018).
57. Mas, B. et al. Group 16 elements control the synthesis of continuous fibers of carbon nanotubes. *Carbon* **101**, 458-464 (2016).
58. Chauhan, D., Pujari, A., Zhang, G., Dasgupta, K., Shanov, V. N. & Schulz, M. J. Effect of a metallocene catalyst mixture on CNT yield using the FC-CVD process. *Catalysts* **12**, 287 (2022).
59. Shang, Y. Y., Wang, Y., Li, S. H., Hua, C. F., Zou, M. C. & Cao, A. Y. High-strength carbon nanotube fibers by twist-induced self-strengthening. *Carbon* **119**, 47-55 (2017).
60. Xiang, R. et al. Encapsulation, compensation, and substitution of catalyst particles during continuous growth of carbon nanotubes. *Adv. Mater.* **19**, 2360-2363 (2007).
61. Yadav, M. D. & Dasgupta, K. Kinetics of carbon nanotube aerogel synthesis using floating catalyst chemical vapor deposition. *Ind. Eng. Chem. Res.* **60**, 2187-2196 (2021).
62. Othman, R. N. & Wilkinson, A. N. The effects of ferrocene concentration on CNT growth on micron silica gel. *AIP Publishing LLC* **1901**, 020003 (2017).
63. Golkarnarenji, G., Naebe, M., Badii, K., Milani, A. S., Jazar, R. N. & Khayyam, H.

Support vector regression modelling and optimization of energy consumption in carbon fiber production line. *Comput. Chem. Eng.* **109**, 276-288 (2018).

64. Khayyam, H. et al. Improving energy efficiency of carbon fiber manufacturing through waste heat recovery: a circular economy approach with machine learning. *Energy* **225**, 120113 (2021).
