# Supplementary material for: Continuously processing waste lignin into high-value carbon nanotube fibers
Source: PubMed Central journal article supplement (PMC9525656; doi:10.1038/s41467-022-33496-2), 2022-09-30
Supplement: 41467_2022_33496_MOESM3_ESM.pdf [file 41467_2022_33496_MOESM3_ESM.pdf]

## **Description of Additional Supplementary Files**

File Name: Supplementary Movie 1

Description: Continuously processing waste lignin into high-value carbon nanotube fibers
